# Supplementary material
Source: Research Square preprint supplement (doi:10.21203/rs.3.rs-9174409/v1)
Supplement: Supplementary file 1 [file 87889b8f00c5e20905f147d5.docx]

## Introduction

The idea is to evaluate 15 selected visuals from VABs. The visuals were chosen to try to reflect the main subjects and visuals in VABs in the last 15 years. If similar content is covered in more than one visual, it is because that subject material has often been included in VABs.

There is unrelated work underway to maximise the [general accessibility](https://www.digital.govt.nz/standards-and-guidance/design-and-ux/accessibility) (link to NZ government accessibility standards) of the VABs as part of a planned revamp of the GeoNet website. This is different from evaluating visuals in VABs, but if you have any comments related to how this might affect visuals, please provide those separately.

## Evaluation

The intent of a visual should be to improve or clarify the most important messages in a VAB, and that is the focus of this evaluation. The main criteria to consider are:

- Clarity of message. Does the message of the VAB, or one of them if there are more than one, come across in the visual?
- Clarity of information or data shown. How clear is what is shown in the visual? If it claims to show a trend, is that trend obvious? If it is a photograph that claims to show something, is that clear to an inexperienced audience? Is something that needs to be highlighted labeled or otherwise identified?
- Does the visual have missing or unnecessary information or distractions? Is an important aspect of the visual not shown, or conversely, is there too much “chart clutter” – unnecessary elements that distract from information or data in the visual?

### Colour

We tend to use colour without really thinking about it. There are three aspects this. You can comment of these separately, but it is also okay to include them as part of other comments, such as about distractions in a visual.

#### Colour Vision Deficiency friendly

Is the visual friendly to someone who has a colour vision deficiency, i.e. is “colour blind”? I have done this for you using <https://bioapps.byu.edu/colorblind_image_tester>. This is a “colour blind image tester” for moderate-to-severe, red-green colorblindness (deuteranopia), the most common type (affecting 1 in 12 men and 1 in 200 women). While we can’t test every visual for all varieties of colour blindness, ensuring a visual is friendly to the most common type of colour blindness is a fair goal.

#### Colour contrast

You can use <https://www.siegemedia.com/contrast-ratio> to check the contrast of text, symbols or lines in one colour against the background colour and determine if the contrast is sufficient. Low contrast text/symbols may be difficult to see for people that have degenerative eye conditions such as cataracts. You need to know the numeric value for the colours, which you can most easily do with a colour picker as a browser extension. In most cases, our VAB visuals are drawn against a white background so the contrast ratio is sufficient for most colours, but care needs to be taken when using light shades.

#### Sensible use of colours

Does a visual use colours in a way that adds clarity, perhaps to distinguish one set of data from another? Are colours used unnecessarily when greyscale would suffice? This can be related to whether a visual is colour vision deficiency friendly. Are colours that are used relevant to the data, what people expect, e.g. red-hot, blue cold?

## Scoring

Qualitative, free text comments are more difficult to work with than quantitative data. A simple scoring system doesn’t replace considered and well written comments, but can be valuable in ranking visuals and helping prioritise recommendations. Score each visual as 1, 2, or 3. A score of:

- 1 means a visual failed to get across the intended information, because the information was not clear or was substantially diluted by other material.
- 2 means a visual achieved what it set out to do. A general audience could discern the information it contained, regardless of any issues it may have.
- 3 means a visual that achieved what it set out to do and did it in a way that made the information easy to understand, although it still might have some issues.

## Example

I have provided an example of how I evaluated a visual. You don’t have to do it exactly how I have, but some consistency between evaluators will make it easier to understand your thoughts.

Thank you,

Steven Sherburn

2025-07-28

### Example Visual Evaluation

| 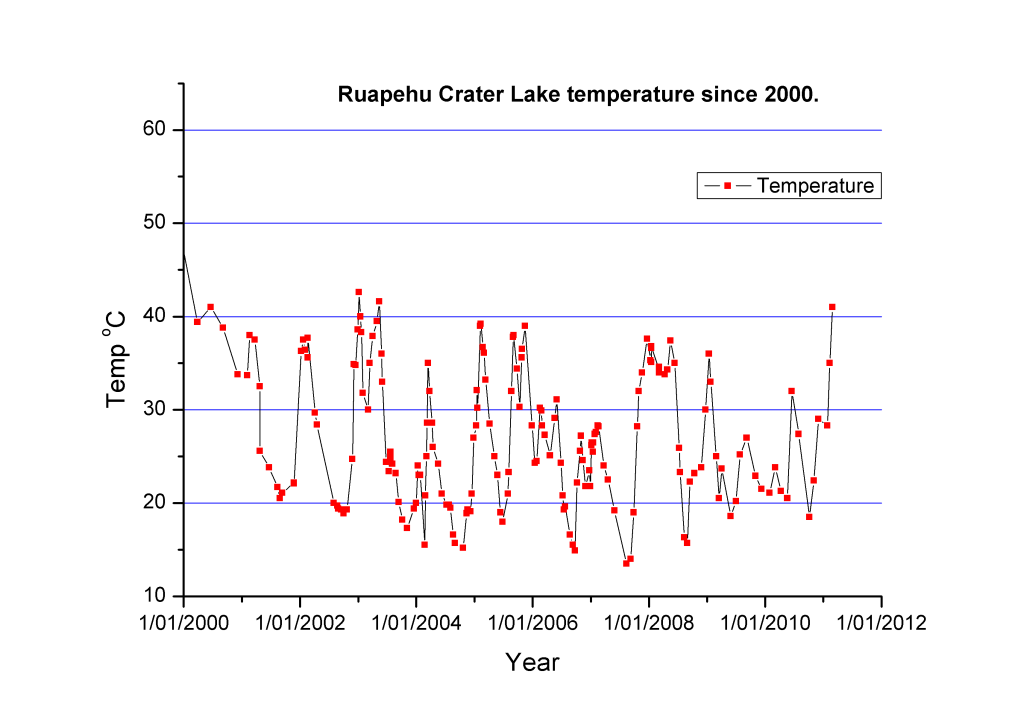 | **VAB** RUA-2011-01 |
| --- | --- |
| **VAB message**  Crater Lake heating |
| **Visual requirements**  Should shown lake temperature increasing |
| **Caption** Ruapehu Crater Lake temperatures since 2000 |
| **Type** time-series |
| **Blue/green colourblind friendly** yes |

| **Clarity of message** | **Clarity of information/data** | **Missing or unnecessary information or distractions** | **Colour and accessibility** | **Score 1-3** |
| --- | --- | --- | --- | --- |
| *Title and caption describe data, but not message* | *Data markers and lines are clear*  *Signal not identified* | *X-axis tick label better if only year*  *X-axis “Year” label unnecessary*  *Y-axis scale too high, could stop at 50*  *Grid lines unnecessary*  *Legend unnecessary* | *Colours have no special significance*  *Contrast sufficient* | *2* |

### Visual 1

| 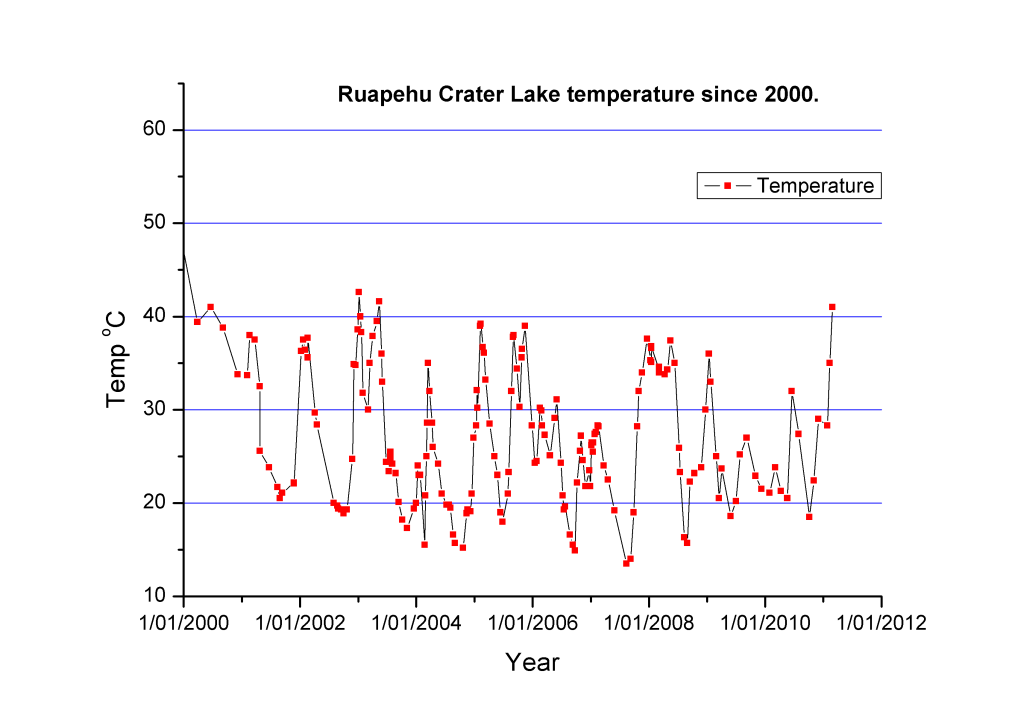 | **VAB** RUA-2011-01 |
| --- | --- |
| **VAB message**  Crater Lake heating |
| **Visual requirements**  Should shown lake temperature increasing |
| **Caption** Ruapehu Crater Lake temperatures since 2000 |
| **Type** time-series |
| **Blue/green colourblind friendly** yes |

| **Clarity of message** | **Clarity of information/data** | **Missing or unnecessary information or distractions** | **Colour and accessibility** | **Score 1-3** |
| --- | --- | --- | --- | --- |
|  |  |  |  |  |

### Visual 2

| 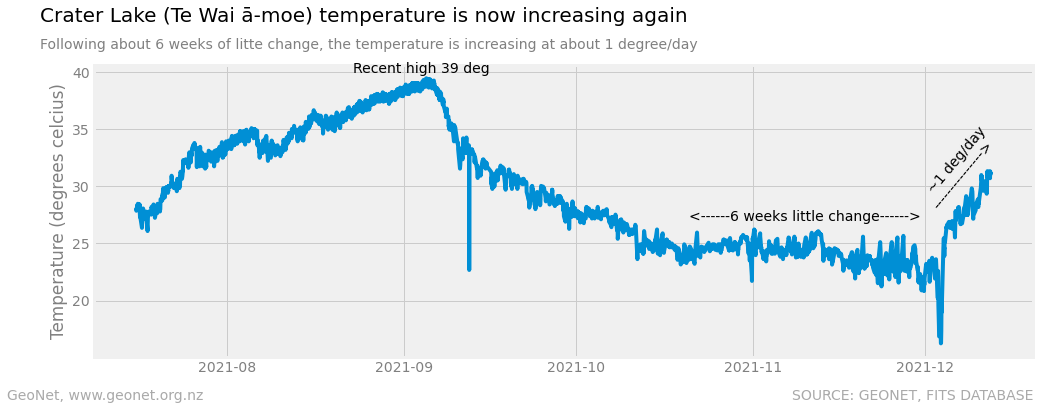 | **VAB** RUA-2021-06 |
| --- | --- |
| **VAB message**  Crater Lake heating |
| **Visual requirements**  Should shown lake temperature increasing |
| **Caption** Plot of the daily average Crater Lake temperature as measured at the outlet since July 2021. Short duration spikes in the data are not necessarily representative of the whole lake |
| **Type** time-series |
| **Blue/green colourblind friendly** yes |

| **Clarity of message** | **Clarity of information/data** | **Missing or unnecessary information or distractions** | **Colour and accessibility** | **Score 1-3** |
| --- | --- | --- | --- | --- |
|  |  |  |  |  |

### Visual 3

| 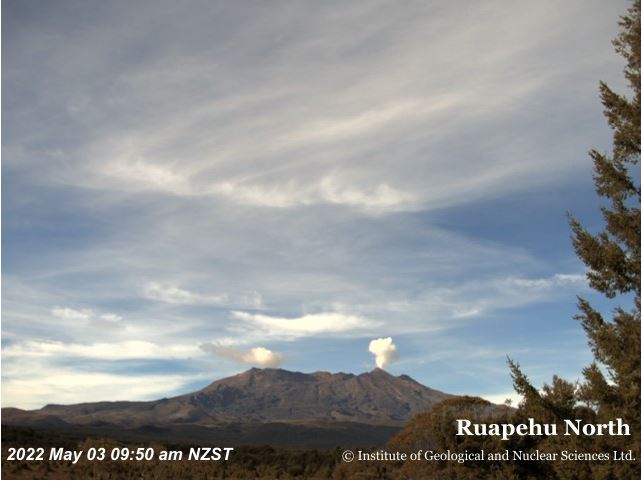 | **VAB** RUA-2022-09 |
| --- | --- |
| **VAB message**  Steam plume visible at Mt Ruapehu, volcanic unrest continues |
| **Visual requirements**  Should show steam plume |
| **Caption** GeoNet image of Ruapehu from earlier this morning |
| **Type** photograph |
| **Blue/green colourblind friendly** not applicable |

| **Clarity of message** | **Clarity of information/data** | **Missing or unnecessary information or distractions** | **Colour and accessibility** | **Score 1-3** |
| --- | --- | --- | --- | --- |
|  |  |  |  |  |

### Visual 4

| 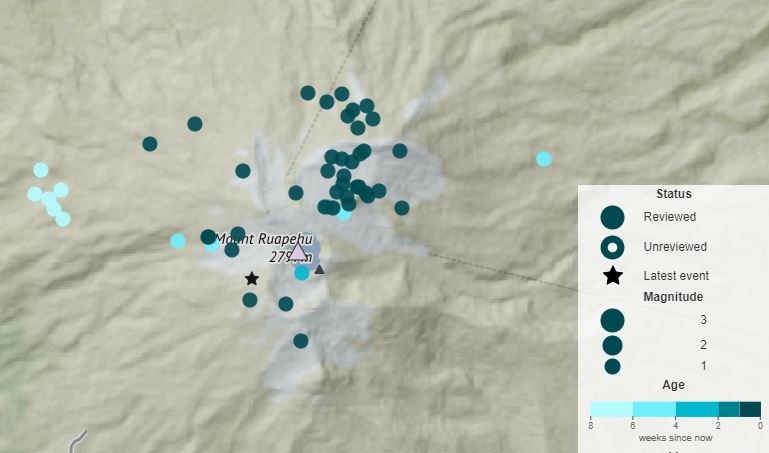 | **VAB** RUA-2023-06 |
| --- | --- |
| **VAB message**  Earthquake activity recorded beneath Mt Ruapehu. Te Wai ā-moe (Crater Lake) slowly heating |
| **Visual requirements**  Should show earthquake activity |
| **Caption** Earthquake locations (circles) beneath Mt Ruapehu. Darker coloured circles show earthquakes during the past week. Lighter coloured circles show older earthquakes. |
| **Type** map |
| **Blue/green colourblind friendly** yes |

| **Clarity of message** | **Clarity of information/data** | **Missing or unnecessary information or distractions** | **Colour and accessibility** | **Score 1-3** |
| --- | --- | --- | --- | --- |
|  |  |  |  |  |

### Visual 5

| 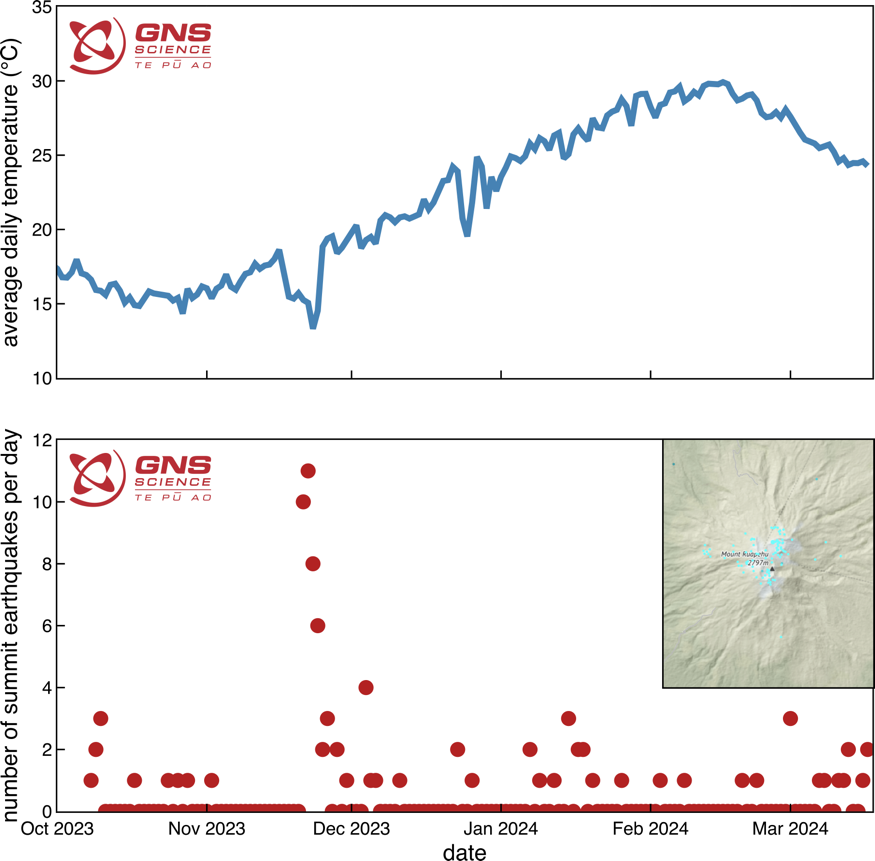 | **VAB** RUA-2024-02 |
| --- | --- |
| **VAB message**  Te Wai ā-moe (Crater Lake) heating episode is over at Mt Ruapehu |
| **Visual requirements**  Should show heating has ended |
| **Caption** Plot of Te Wai ā-moe (Crater Lake) temperature (top) and number of earthquakes under the summit per day over time, from October 2023 to March 2024 (bottom – see inset for map of earthquake locations) |
| **Type** time-series and map |
| **Blue/green colourblind friendly** yes |

| **Clarity of message** | **Clarity of information/data** | **Missing or unnecessary information or distractions** | **Colour and accessibility** | **Score 1-3** |
| --- | --- | --- | --- | --- |
|  |  |  |  |  |

### Visual 6

| 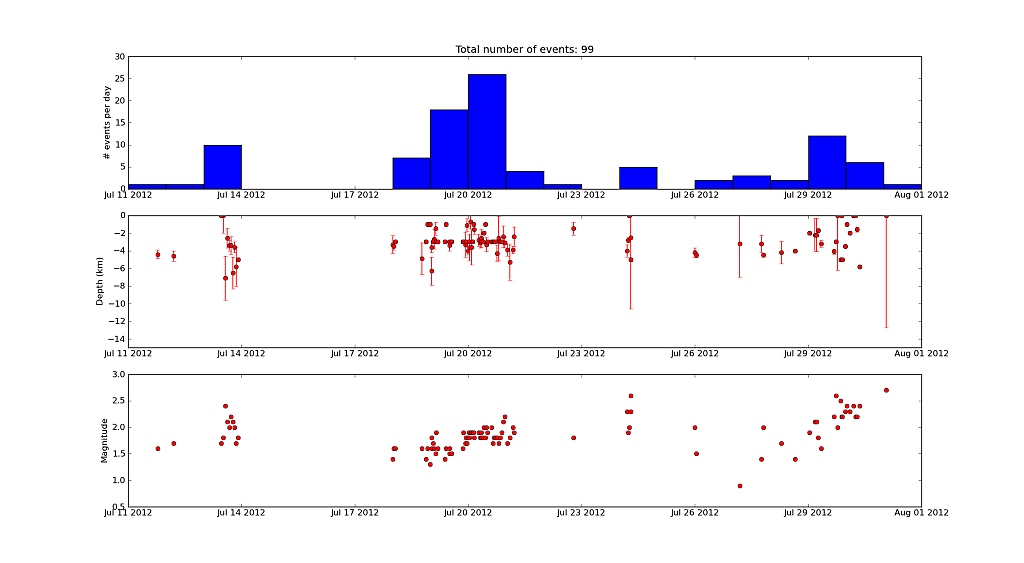 | **VAB** TON-2012-03 |
| --- | --- |
| **VAB message**  Mt Tongariro update |
| **Visual requirements**  Should show that earthquakes have occurred |
| **Caption** Frequency of volcanic earthquakes recorded at Mount Tongariro |
| **Type** time-series |
| **Blue/green colourblind friendly** yes |

| **Clarity of message** | **Clarity of information/data** | **Missing or unnecessary information or distractions** | **Colour and accessibility** | **Score 1-3** |
| --- | --- | --- | --- | --- |
|  |  |  |  |  |

### Visual 7

| 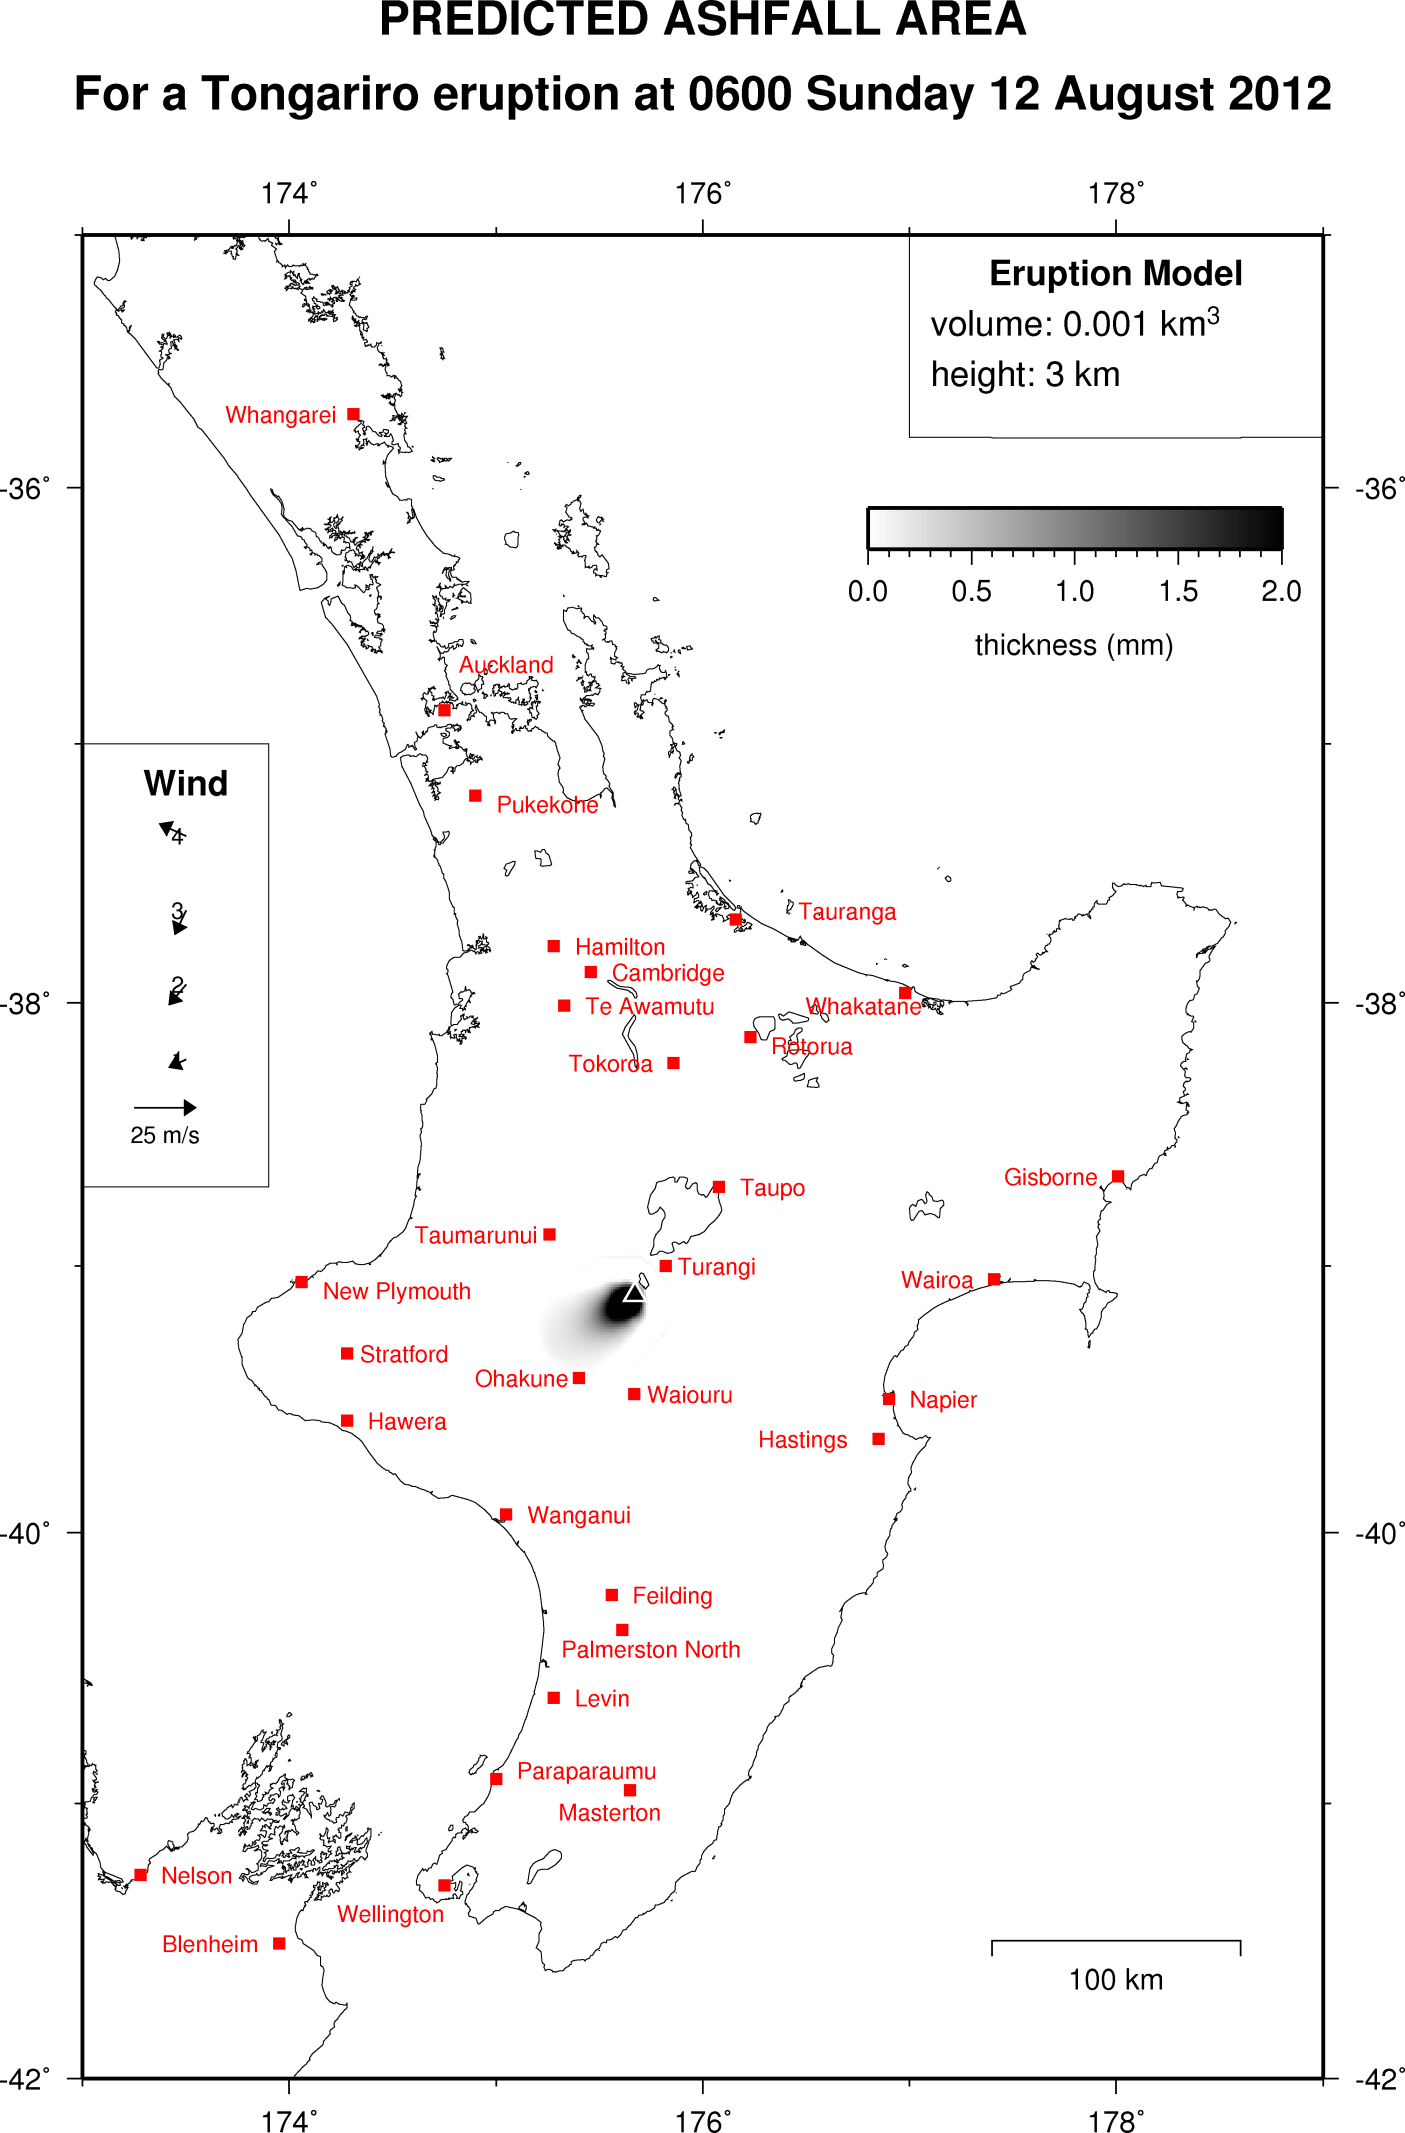 | **VAB** TON-2012-16 |
| --- | --- |
| **VAB message**  Tongariro eruption update (ashfall map) |
| **Visual requirements**  Should show where ash may fall |
| **Caption** Predicted ashfall area for Tongariro |
| **Type** map |
| **Blue/green colourblind friendly** yes, map is greyscale |

| **Clarity of message** | **Clarity of information/data** | **Missing or unnecessary information or distractions** | **Colour and accessibility** | **Score 1-3** |
| --- | --- | --- | --- | --- |
|  |  |  |  |  |

### Visual 8

| 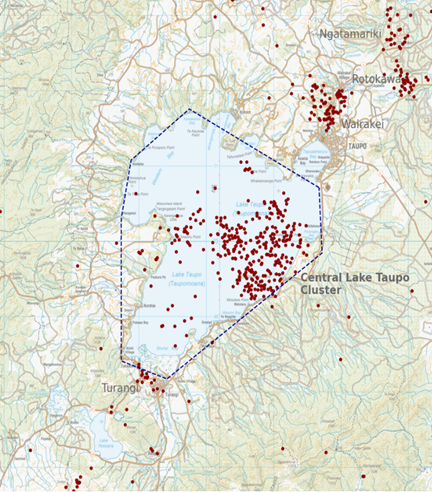 | **VAB** TP-2022-01 |
| --- | --- |
| **VAB message**  Earthquake activity under Lake Taupō picks up |
| **Visual requirements**  Should show some aspect of earthquake activity having increased under the lake |
| **Caption** Earthquakes located by GeoNet in the Lake Taupō area from January 1 to July 21, 2022. All earthquakes shown here were located less than 30 km deep. There are just over 300 earthquakes shown on the map |
| **Type** map |
| **Blue/green colourblind friendly** yes |

| **Clarity of message** | **Clarity of information/data** | **Missing or unnecessary information or distractions** | **Colour and accessibility** | **Score 1-3** |
| --- | --- | --- | --- | --- |
|  |  |  |  |  |

### Visual 9

| 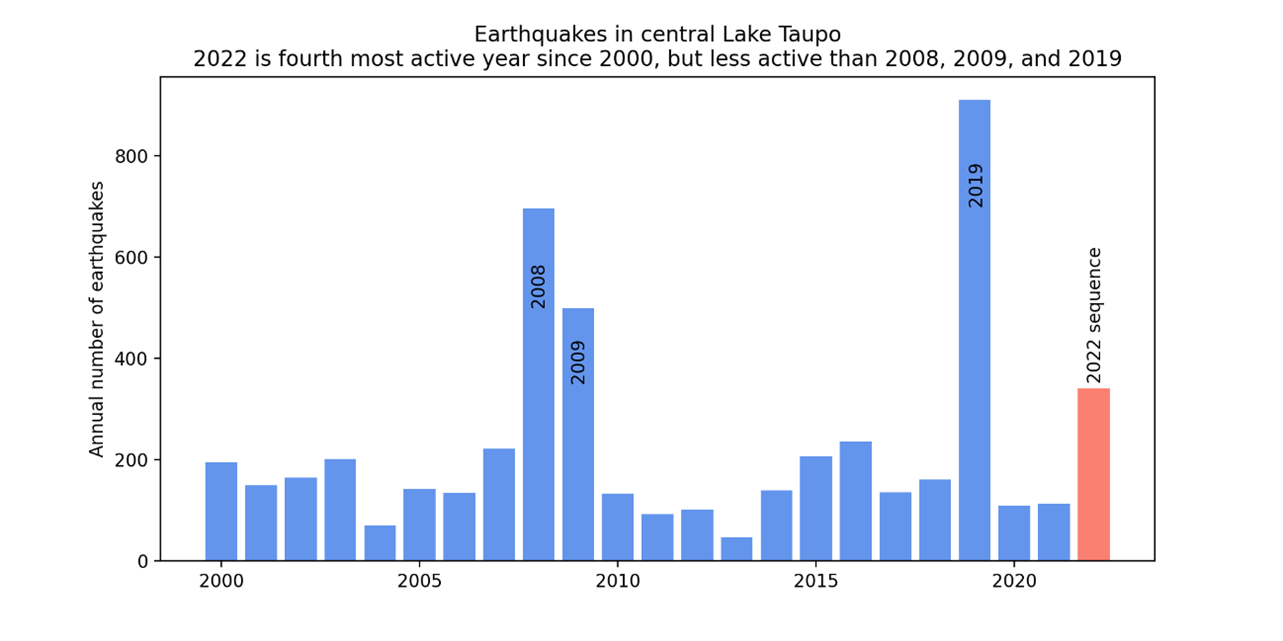 | **VAB** TP-2022-01 |
| --- | --- |
| **VAB message**  Earthquake activity under Lake Taupō picks up |
| **Visual requirements**  Should show some aspect of earthquake activity having increased under the lake |
| **Caption** Earthquakes detected and located in the dashed area outlined in the map each year since 2000. The 2022 sequence of earthquakes stands out, but at this stage has fewer earthquakes than 2008, 2009, and 2019 |
| **Type** time-series |
| **Blue/green colourblind friendly** yes |

| **Clarity of message** | **Clarity of information/data** | **Missing or unnecessary information or distractions** | **Colour and accessibility** | **Score 1-3** |
| --- | --- | --- | --- | --- |
|  |  |  |  |  |

### Visual 10

| 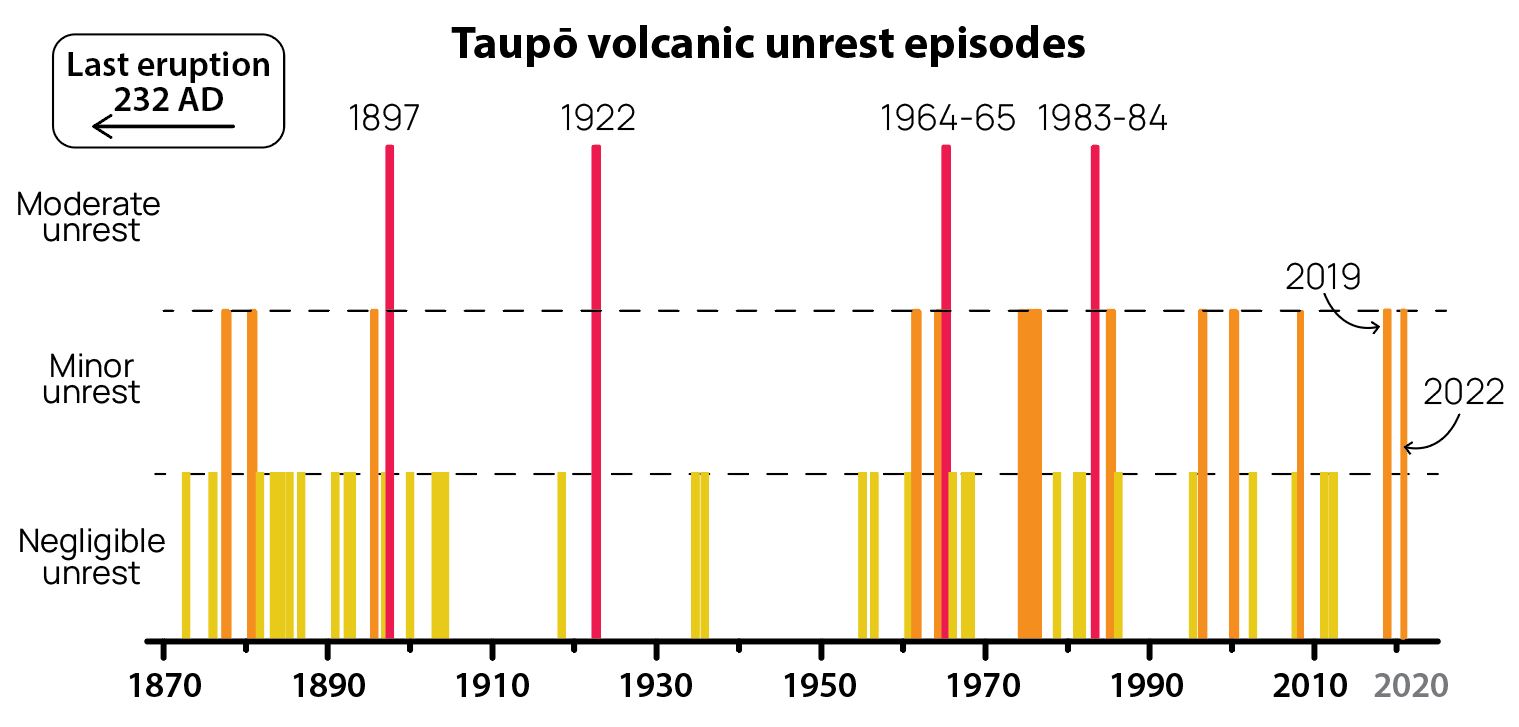 | **VAB** TP-2022-04 |
| --- | --- |
| **VAB message**  Ongoing earthquakes and deformation indicating minor volcanic unrest |
| **Visual requirements**  Should show ongoing earthquakes or deformation, or some aspect of how this means volcanic unrest |
| **Caption** The magnitude of past unrest episodes at Taupō Volcano |
| **Type** time-series |
| **Blue/green colourblind friendly** yes |

| **Clarity of message** | **Clarity of information/data** | **Missing or unnecessary information or distractions** | **Colour and accessibility** | **Score 1-3** |
| --- | --- | --- | --- | --- |
|  |  |  |  |  |

### Visual 11

| 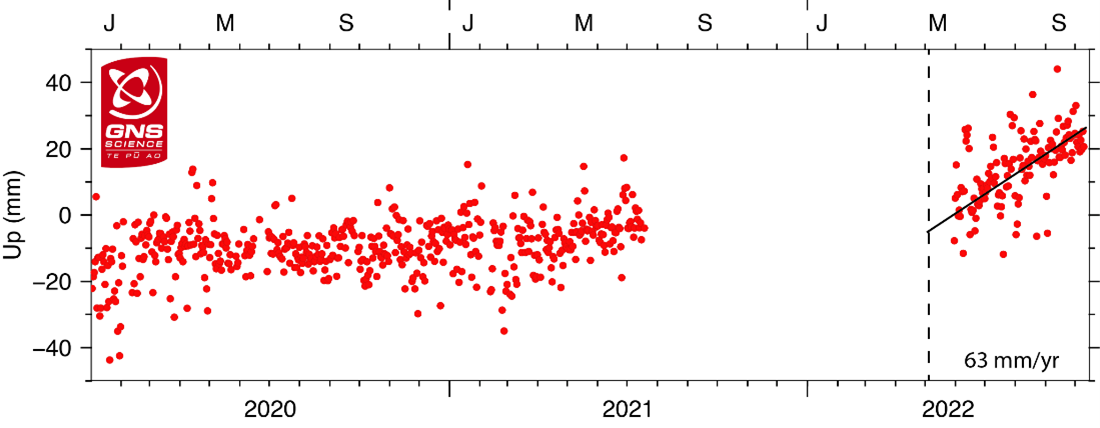 | **VAB** TP-2022-06 |
| --- | --- |
| **VAB message**  Minor unrest ongoing at Taupō Volcano |
| **Visual requirements**  Should show some aspect of ongoing volcanic unrest |
| **Caption** GNSS ground uplift observed at Horomatangi Reef in central Lake Taupō since 2020. The observations represent daily elevations. The scatter in the observations reflects the uncertainty in the calculated daily elevations. The GNSS at Horomatangi Reef was not operating from mid-2021 to mid-2022 |
| **Type** time-series |
| **Blue/green colourblind friendly** yes |

| **Clarity of message** | **Clarity of information/data** | **Missing or unnecessary information or distractions** | **Colour and accessibility** | **Score 1-3** |
| --- | --- | --- | --- | --- |
|  |  |  |  |  |

### Visual 12

| 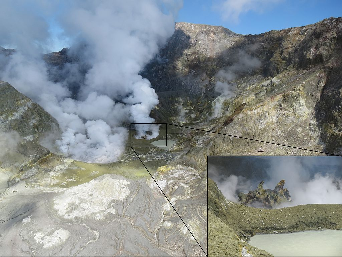 | **VAB** WI-2012-16 |
| --- | --- |
| **VAB message**  Spiny Lava Dome – A New and Unusual Style of Eruptive Activity At White Island |
| **Visual requirements**  Should show the lava dome |
| **Caption** A compiled image showing the wide and close up views of the active crater area and the dome |
| **Type** photograph |
| **Blue/green colourblind friendly** not applicable |

| **Clarity of message** | **Clarity of information/data** | **Missing or unnecessary information or distractions** | **Colour and accessibility** | **Score 1-3** |
| --- | --- | --- | --- | --- |
|  |  |  |  |  |

### Visual 13

| 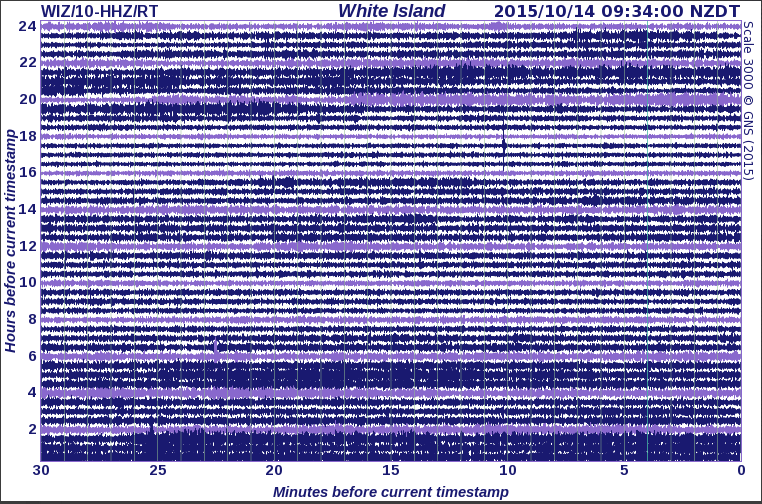 | **VAB** WI-2015-01 |
| --- | --- |
| **VAB message**  Slight increase in volcanic unrest at White Island (Whakaari) |
| **Visual requirements**  Should show some aspect of increased unrest |
| **Caption** Seismic drum for White Island, note the 'banding' of the tremor |
| **Type** seismogram |
| **Blue/green colourblind friendly** yes |

| **Clarity of message** | **Clarity of information/data** | **Missing or unnecessary information or distractions** | **Colour and accessibility** | **Score 1-3** |
| --- | --- | --- | --- | --- |
|  |  |  |  |  |

### Visual 14

| 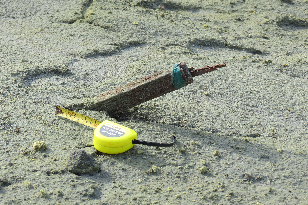 | **VAB** WI-2016-07 |
| --- | --- |
| **VAB message**  Details of April 27 eruption unraveling |
| **Visual requirements**  Should show some aspect of the eruption |
| **Caption** Survey Peg D snapped off by blast |
| **Type** photograph |
| **Blue/green colourblind friendly** not applicable |

| **Clarity of message** | **Clarity of information/data** | **Missing or unnecessary information or distractions** | **Colour and accessibility** | **Score 1-3** |
| --- | --- | --- | --- | --- |
|  |  |  |  |  |

### Visual 15

| 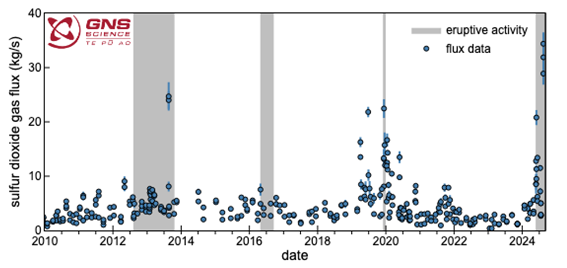 | **VAB** WI-2024-18 |
| --- | --- |
| **VAB message**  Update from gas flight: volcanic gas emissions increase with minor ash emissions continuing |
| **Visual requirements**  Should show some aspect of gas or ash emissions |
| **Caption** Amount of sulphur dioxide (SO2) gas (blue circles) emitted since January 2010. Periods of eruptive activity are shown by grey bands in the background. SO2 emissions have increased since the volcanic activity increased at the end of May 2024 (grey region to the far right of the plot) |
| **Type** time-series |
| **Blue/green colourblind friendly** yes |

| **Clarity of message** | **Clarity of information/data** | **Missing or unnecessary information or distractions** | **Colour and accessibility** | **Score 1-3** |
| --- | --- | --- | --- | --- |
|  |  |  |  |  |
