# Supplementary material
Source: Research Square preprint supplement (doi:10.21203/rs.3.rs-9174409/v1)
Supplement: Supplementary file 2 [file 9a44f24f412934ccec86c1ee.xlsx]

## Sheet: Sheet1
Number	VAB	Clarity of message	Clarity of information/data	Missing or unnecessary information or distractions	Colour and accessibility	Score 1-3	Score comment	Evaluator
1	RUA-2011-01	Title and caption describe data, but not message	Data markers and lines are clear. Signal not identified	X-axis tick label better if only year. X-axis “Year” label unnecessary. Y-axis scale too high, could stop at 50. Grid lines unnecessary. Legend unnecessary	Colours have no special significance. Contrast sufficient	2		A
1	RUA-2011-01	Subtle but there for those familiar with data plot	Maybe to subtle. Time period used maybe to long	X-axis use year labels (eg 2010). Y-axis trim to 50 C. Gridlines help for comparisons. No data source (GeoNet). No GNS logo	Good contrast between data and trend (connecting) lines	2		B
1	RUA-2011-01	Message not really clear – I read as it’s been up and down a lot over the last 11 years. No source/author logo	Data is clear. Arrow could be added to show trend upwards. Caption doesn’t include data source.	The X axis could be reduced to last few years – timeseries too long. Y axis could be limited to 50 degrees. Legend distracting. Gridlines distracting. Year label not needed.	Looks ok. Blue gridlines distracting	2		C
1	RUA-2011-01	Unclear	Plot is clear, message is not		Blue horizontal lines are distracting	2		D
1	RUA-2011-01	Message can be inferred from the data plotted but is not in the caption or title.	The points and lines on the figure are clear. The trend is not labelled, which given the long timeline shown could make it hard to pick out.	Legend is not needed. Horizontal grid lines are not needed. y-axis could stop at 50 y-axis label should be temperature (rather than temp). Data source missing.	Contrast looks ok	2		E
1	RUA-2011-01	Visual alone doesn’t convey the recent heating trend; could adapt title, or colour or symbols to highlight recent data.	More or less ok	Y-axis too high. Days/months clutter x-axis (could just be year, or Jan/08 if wanted to convey time of year). Grid lines unimportant to the stated goal of figure, could be useful in other context.	Fine enough	2		F
1	RUA-2011-01	Not overly clear, the messaging seems to indicate the lake has been heating up since 2000	The graph is clear and easy to read	To many years of data. If the messaging is about the lake heating up, show just that trend, possible against and average.		2		G
1	RUA-2011-01	If the message is the lake is heating, the graph shows more of what the lake has done in past	I think it could emphasize/highlight recent heating period, and normal trends	I would say there is room for more labels	ok	2		H
1	RUA-2011-01	caption describes the visual not message	Clear and understandable	Unsure the purpose of the red dots. Temp 60 degrees seems unnecessary in this graph.	No issue	2		J
1	RUA-2011-01	Clear	Clear	What happened in 2000? Would be better to use the most recent eruption event ‘9	Clear	2		K
2	RUA-2021-06	Title provides message	Data lines are clear. Signals identified by labels	Background colour distracting. X-axis tick label year and month might have been better. Grid lines not necessary	Colours have no special significance. Contrast sufficient	3		A
2	RUA-2021-06	It is in graph title, but not in caption	X and y-axis and additional information is too light cannot read it easily. Grid lines help	No GNS logo. Caption too wordy	Background could be lighter. Some text/labels too light	2		B
2	RUA-2021-06	Message clear – although the visual is telling a few diff stories (recent high, 6 weeks little change and recent increase). Added narration on data is good.	Includes source and author	Line thickness too much. Could use a generalized trend line rather than all the ups and down spikes. Grey background not needed. Grid lines not needed. X axis could be better labelled. Y axis label could be shortened.	Looks ok. Contrast could be better (blue on grey)	2		C
2	RUA-2021-06	I don’t love it, but you do get the message	Wondering if small labels are better than say highlighting the two sections and then writing below?	Double header is a bit busy. Small labels on the plot are hard to read		3		D
2	RUA-2021-06	Message is shown by the data chosen and also highlighted in the graph title, sub-title, and annotated clearly on the plot.	Trend (lake T is increasing) is clear from the data and directly labelled. Could have labelled a “short duration spike” for clarity Label’s could say °C instead of deg	Missing GeoNet logo? Grid lines unnecessary. Missing y-axis label (e.g., date (year-month))	White background would be clearer. Black text for axes numbers/labels would be clearer.	3		E
2	RUA-2021-06	Very clear, title states key message. Additional labels draw attention to key points. Context established.	Additional data that might be useful included (e.g. spikes in caption, gradient). Like the FITS reference, but that might just be me (could include in subtext in more of the source of data to help users – see every other visual here).	Sub-title adds nothing that isn’t elsewhere in figure. I think oC would be better on X-axis. Would make axis clearer (Temperature would stand out more). Could smooth data to remove spikes and ensure right points drawn from plot. Should say Ruapehu Crater Lake, and in brackets, with Te Wai ā-moe prominent as name (above all should say Ruapehu somewhere).	Blue is striking = good. Light grey text (sub-title, axes, source info, etc.) is hard to read = not so good.	3		F
2	RUA-2021-06	I can understand it but it takes a while due to the wordiness of the description about the short duration spikes.	Very clear, and the annotations add to ease of interpretation	The short duration spike info seems like its not needed, messaging should focus on ‘trend’		2		G
2	RUA-2021-06	Again need to emphasize the heating bit if that is the important message. To me the message is “the lake is heating and this is normal” why are we telling people the lake is heating ?	I like the labels, light grey hard to read. Is the heating rate faster than normal is that something you want/need to show ?	Ok I don’t think you need to spell out degrees celsius	Grey hard to read	2		H
2	RUA-2021-06	Use of ‘now’ and ‘again’ seems repetitive in description. Message and visual seem to correlate	Caption describes ‘short duration spikes’ but visually these don’t stand out.	The focus seems to be on the 6 weeks of little change and subsequent heating – the visual perhaps should focus on this – all other info seem unnecessary.	Line is thick harder to pick out individual temp.	1		J
2	RUA-2021-06	Caption confuses things in terms of it being for the whole lake but also not representative of the whole lake. Wonder if it could be worded slightly differently?	Y	Captions on graph are helpful. The year is not relevant, days of week would be better		2		K
3	RUA-2022-09	No title, caption does not explain	Two apparent steam plumes, real one not identified. Standard annotation provides clear information		Annotation clear	2		A
3	RUA-2022-09	Caption doesn’t capture theme	Photo shows phenomena very clearly	Caption doesn’t capture-identify which cloud is the steam plume nor reinforce key message	Nice clear photo	2.25	2+ score given	B
3	RUA-2022-09	Does show steam plume	No label on the plume – reader has to work out that information (although pretty obvious to me). Location and time/date included.	Unfortunate location of cloud on left hand side makes me think there are two plumes	Good contrast on text	3		C
3	RUA-2022-09	Clear	Clear			3		D
3	RUA-2022-09	Message can be inferred from the image but is not labelled on the image or stated in the caption.	Plume is not labelled and there are two plume-like objects in the image, which could cause confusion.	No missing or unnecessary information in the visual.	Colour photograph is appropriate here.	2		E
3	RUA-2022-09	Steam plume visible ok (could improve clarity by circling/pointing to steam plume and labelling)	Ruapehu North is unclear – site name? Ruapehu from North? Time stamp good, easy to read. While its quite zoomed out (which would let feature stand out more), I like it that it matches the visuals provided so can compare to current activity easily.	Could zoom in to highlight plume - would especially be needed if features of plume were relevant. Zoom amount needed dependent on medium/size (this size is ok, a smaller image would need to be zoomed to highlight plume). I think just Ruapehu, or Ruapehu volcano is better than Mt. Ruapehu (as it is in the caption, but not the VAB message – should be consistent).	Copyright text hard to read, otherwise text is ok. It’s an image, so colours have to be true to life	2		F
3	RUA-2022-09	Very clear	Easy to interpret	Nothing missing		3		G
3	RUA-2022-09	To me the plume is obvious but I suspect some labels and arrows would help there are two potential plumes	Labels, not clear which direction looking, is camera in north looking south or facing north	Maybe add location of crater lake	ok	2		H
3	RUA-2022-09	Visual and message clear.		Unsure whether confusion over which plume is being referenced – based on the assumption that people don’t know where the crater is (this could be unnecessary feedback).	Photos are great.	3		J
3	RUA-2022-09	Y	Y	Y	Y	3		K
4	RUA-2023-06	No title, caption explains content but not message	Markers clear, triangle marker not explained	Basemap distracting to some, useful context to others. Legend useful, but distracting	Standard colours for this produc.t Contrast sufficient	2		A
4	RUA-2023-06	Clear image to show there are earthquakes. No information about temperature	The age, size data confuses the picture-key message	Crater Lake-Mt Ruapehu poorly located. Temperature side of story not covered. Too much technical information	Colour contrast is good for darker dots, not so good on lighter	2		B
4	RUA-2023-06	Poor. Not clear its earthquakes without looking at caption	Are they all the same magnitude? They all look the same size. No label on map that this is earthquake data	No title, north arrow, scale, source etc. Status symbology not needed and distracting. Volcano name hidden. No map to show wider region. Too much detail in legend.	Contrast lighter blue and base map needs work. Line around circles maybe	1		C
4	RUA-2023-06	Clear	Doesn’t say that the dots are earthquakes anywhere on the map or key		Lighter to dark / old to new scale is confusing	3		D
4	RUA-2023-06	Message can be inferred from the figure but is not labelled on the figure or stated in the caption.	The key explains the symbols on the map well.	Missing scale (distance) bar. Missing data source. Missing GeoNet logo?	Contrast seems ok.	2		E
4	RUA-2023-06	Too small to be easily seen. But overall clarity is ok. No context to this activity (could have text indicating something like “27 in past week, average earthquakes/week (last 12 months) is 5)”. No timing for figure within figure.	I think ski lift lines are ok, but not labelled (however not distracting, and for those who know the mountain/plan to ski, potentially useful context)	No need to have unreviewed option. “Weeks since now” is odd wording – maybe “weeks prior to today” – better yet, replace with date range (no year). Caption could indicate date range of earthquakes shown (with year). Also weeks since now text is very small. No scale.	Lake is not visible, text in legend (in particular weeks and caption) is too small	1.5		F
4	RUA-2023-06	Message is clear and easy to understand	Hard to know how close these EQs are with no scale or reference.	Missing a scale. Maybe other landmarks for reference.		2		G
4	RUA-2023-06	If message is earthquakes beneath Ruapehu maybe cross section would be better ? Crater lake not visible	How does this compare to normal activity ? No heating info ? Are heating and earthquakes together normal	Is depth info important	ok	2		H
4	RUA-2023-06	Message and visual relate, reference to heating might be irrelevant.	Everything fits and is clear. I like the shift from previous descriptions - Crater Lake (Te Wai ā-moe) to Te Wai ā-moe (Crater Lake).	Depth of eq missing. No description on timeframe except on graph. Two triangles present but no reference. Words covered. Satellite imaging could be better.	Map – satellite image could help indicate where these are occurring, but may remove focus of eq plots.	2		J
4	RUA-2023-06	Visual is clear but message is not. What does more eq mean?	Hard to differentiate magnitudes, circles could easily be misunderstood/ misrepresented.	A time series would be beneficial below the map, or a depth. Anything else to support this visual. If everything else is plotted it makes sense to also plot the triangles.	?	1		K
5	RUA-2024-02	No title, caption explains content in detail, but doesn’t identify any message	Data markers and lines are clear Axes tick labels sufficient, if someone wants to use only upper sub-plot there are no date labels Inset map symbols not clear against background	GNS logos dominate	Light blue symbols on map at this small scale are not very clear, but is standard product so can’t be changed	2		A
5	RUA-2024-02	Very clear simple data plots	Good clear data points/lines	All key information is there	Good strong contrasts	3		B
5	RUA-2024-02	Shows two messages: heating has stopped and EQS have reduced. Not sure how map adds to figure	Temp data clear, but could do with a trend arrow to help guide reader. EQ timeseries and map takes a little more work to understand.	No daily EQ data are distracting at the bottom. Map good, but not sure what it is referring to. Should there be EQs on it? Or a lack of Eqs? Title of the 2 graphs needed	Good. Map labelling tiny	2		C
5	RUA-2024-02	Top plot shows the message a bit. The earthquake plot below doesn’t add to the message	Hard to see the quake dots on the map	Plots need clear headings on top		1		D
5	RUA-2024-02	Message can be inferred from the figure but is not labelled on the plot or stated in the caption.	The figure should be labelled to show that decreasing temperature means the heating has ended. Lines are clear	Missing data source y-axis could stop at 30. Could have tick marks along the top of the panels to help connect them to dates along the bottom	Contrast is good	2		E
5	RUA-2024-02	Like the comparison between datasets here. Prefer Eq/week than just map of EQ. Could label max T and decreasing trend to help highlight recent cooling (see figure 2). Doesn’t really drive home that heating has ended, but otherwise visually appealing and easy to interpret	Axes good range. Like the MMM YYYY style for date.	Could label inset within figure, not in caption. No scale on inset. Is data smoothed?	Labels, axes clear – black and large enough.	1.5		F
5	RUA-2024-02	Message is clear and easy to understand	Information and data support the message	The map in the top right of the bottom graph doesn’t support what the message is about. It’s not clear why the earthquakes and their location relate to the cooling trend.		2		G
5	RUA-2024-02	I like the time series on top of each other. But if message is heating has stopped, I am more focused on earthquakes during heating	Is earthquakes part of key message ?	Maybe need to label peak and current cooling	Maybe need to label peak and current cooling	2		H
5	RUA-2024-02	Message is clear. Comparatively, message contains more info than previous examples – which is better.	Words are clear and easy to follow.	Lines in the graphs to help line up the temp and dates (Te Wai ā-moe temp). Red dots along the bottom line – unclear of purpose – to show no eqs?	oo much space in the graphs without a coloured background.	1		J
5	RUA-2024-02	Y	As a non-scientist, I am unsure what these two graphs are showing me as a whole picture/ unsure how to interpret the data.	Why have 0 dots? Top graph needs X axis details regardless if same time frame. Bottom graph could have grid lines to help interpret data.	?	2		K
6	TON-2012-03	Title adds nothing. Caption refers to top sub-plot but ignores others	Events per day shows variations mentioned in text Depth and magnitude sub-plot snot required Error bars not explained	Axes labels and tick labels clear, but overlap	Colours overly bright – blue is dominant	1		A
6	TON-2012-03	Complex as data is shown in 3 ways. Key message was ‘frequency of Volcanic Eq’s’ could have been achieved with just top plot	Text us too small on all labels. Data points are small	Error bars make it complex	Colours work, good contrast, on white back ground	1.75	2- score given	B
6	TON-2012-03	Word ‘earthquake’ not mention on visual. Too many messages for one visual	Take a lot of reading to understand information	Depth timeseries distracting if not referred to in text. Too many charts in one figure. Title of bottom 2 graphs missing. Only one Y axis label is required as all the dates are the same.	Bar chart blue is too much – contrast quite bright. Data and text too small	1		C
6	TON-2012-03	Bottom two plots don’t add to the message	Depth and magnitude info is probably clearer in a sentence		Oh, those blue bars, very distracting!	2		D
6	TON-2012-03	Message can be inferred from the figure but is not labelled on the figure or stated in the caption.	Symbols are quite small	Depth and magnitude might not be adding much? No data source	Contrast looks ok.	2		E
6	TON-2012-03	Poor, mainly because too small. No understanding of area included. Caption doesn’t mention time range, or depth/magnitude aspects. Title says number of events, nothing describing figure or key message. Sisually unappealing, key message and key info not present	Like the error bar, but points should be much larger. Like the total number of events, but should be an inset text.	way too small, very distracting	Axes labels and info too small, way (should be visual 5 size). Prefer points to histograms (see visual 5). EQ circles way too small.	1.5		F
6	TON-2012-03	Clear message	Easy to read and understand			3		G
6	TON-2012-03	Too small font. Is the type of earthquake relevant are these related to faults or volcano ?	Is this more earthquakes than usual ? maybe just earthquakes per week over longer time frame ?	Why not show size and depth on same plot. If we show depth is it worth labelling	Font too small for oldies	2		H
6	TON-2012-03	Message could convey the update pertains to earthquakes	Good coverage of event number, depth and magnitude. I like the display of the visuals. The use of blue blocks is really clear on how many events occurred each day.	Unsure of the purpose of the lines used in the middle graph and what the different lengths of them mean.	Great	3		J
6	TON-2012-03	The visual is complex for the message it is trying to portray especially for a public facing product	Too much	Too much to interpret in a small visual. What do the vertical lines on the middle graph mean? Could magnitude and depth be visualized differently for clarity?	?	1		K
7	TON-2012-16	Title and sub-title explain content	Map shows intended information, but one map for all volcanoes mean data detail lost. Eruption info box clear, wind info box symbol and text overwrite. Thickness colour bar clear, scale bar clear. Town/city labels clear, but colour dominates	Axes tick labels clear, but not required	Only non-greyscale information (red) overly dominates	2		A
7	TON-2012-16	Caption lacks information- ie shaded area shows predicted area where ashfall may occur	Scale issue using all of Nth Island. Impacted area is small at this scale – work both ways, ie impact is not major however those impacted have little detail	All key information is there, model details, wind, locations, scale	Good contrasts	2.25	2+ score given	B
7	TON-2012-16	Shows the scale of the predicted ashfall area. Doesn’t describe what the data is showing (e.g. the ashfall area is predicted to be SW of the volcano)	Wind info in the legend confusing. Title really useful. Scale not super useful. Doesn’t have forecast window (e.g. valid until X)	Uncertainty information if any. Boundary around predicted ashfall area	Red labels hard to read. Grey colour hard to distinguish at the scale. Needs description of what the map is showing	2		C
7	TON-2012-16	City names being in red are very distracting as your eye is drawn to those first	A bit unclear due to the map area being so large, hard to clearly see where the ash is forecast	Wind icons are confusing		2		D
7	TON-2012-16	Message is stated in the title and in the caption. Predicted suggests it will fall there rather than may fall there?	Place names are obvious. Simple figure.	Should have “ash” before thickness in colour bar. Wind direction arrows seem unnecessary? Doesn’t explain eruption model in caption.	Contrast is good. Colours are simple	3		E
7	TON-2012-16	Key message is clear, ashfall up to 2mm predicted, modelled extent limited. Title says key info clearly.	Needs to be zoomed in to be really clear, but reveals limited ashfall extent. Good that it includes easily digestible eruption info.	No idea how to interpret wind info (also too small). Assuming its wind speed and direction with time? But if so needs to indicate the time, and but much bigger. Text for towns too small, also is way too zoomed out. Should only show names of nearby text? Zoom in significantly.	Too small text, red slightly hard to read. Legend useful, but could be bigger. Axes labels too small.	2		F
7	TON-2012-16	Clear message	The map is quite big in relation to the affected area. I don’t understand the wind panel.	It might help to explain what the model is based off and how that relates to the actual eruption so people can interpret the data.		2		G
7	TON-2012-16	Maybe need an overall message of ash fall potential within 50km of togariro national park	Maybe need to be a bit zoomed in ?	Wind info is confusing ?	ok	2		H
7	TON-2012-16	Message is clear, maybe more efficient to say ‘Tongariro eruption predicated ashfall update’	Clear and straightforward.	Given predicted area was quite small – could’ve zoomed in to show better what the local context was.	No issues	2		J
7	TON-2012-16	Would benefit from more zoom and uncertainty outlines/potential depth outlines	Hard to see as zoomed out, no clear delimitation line. The graph could be zoomed in more given the size of predicted ashfall area, or perhaps two maps could be provided – one for high-level overview and one for details.	Whangarei probably does not need to be displayed	Details are easy to view when printed in b/w.	1		K
8	TP-2022-01	No title, caption describes what map shows	Basemap provides good context, key areas labeled. Markers clear. Area outline distracting could be less strong. No axes or labels - not required as basemap used	Lots of empty space, but not easily avoided given shape of area of interest Is a basemap like this better than a clear background? Context vs potential distractions	Question contrast for place labels, intent was they should not dominate	3		A
8	TP-2022-01	Shows clearly there are eq’s under the lake – no time series component. Needs before v now contrast	Image is clear, gives clarity to data (red dots) and map helps people locate	Image is clear, gives clarity to data (red dots) and map helps people locate	Good contrast	2		B
8	TP-2022-01	Doesn’t really show the message without the caption	Data itself is clear and simple	No legend explain dots and dashed line. No title or source information. No map elements (scale, N arrow, base map ref)	Looks ok	1		C
8	TP-2022-01	Shows earthquakes have occurred and where, but not that there has been an increase	The shape label looks more like a placename due to the colour/font/placement etc.	Perhaps needs a side-by-side of a previous timeframe showing less quakes	Background map detail is a bit distracting	2		D
8	TP-2022-01	Message can be inferred from the figure and is stated in the caption – although there is not comparison to an earlier time period.	Background map is quite busy, which might make it difficult to pick out the key information	No reference to what normal would look like. Caption doesn’t mention that the clusters are labelled	Not sure whether it is red-green colour blind friendly?	2		E
8	TP-2022-01	Title missing – should simple state key message. Not clear at first glance which events are the key ones. Clearer could be – zoom in on lake, colour code date range, then show alongside a plot of eq/day (or week) a la visual 5.	Zoom in to lake Taupo, if the other EQs aren’t the story. Could colour code date ranges.	Date range, and n of eqs should be inset. Topography distracting, could just show roads. Also shows lots of text too small to read (some of it, like Lake Taupo/te reo name vital bits of info). No scale.	Data points are too small. Map impossible to read a lot of the text, so shouldn’t be there if not necessary, bigger if necessary.	1.5		F
8	TP-2022-01	Clear message	Its all easy to understand.			3		G
8	TP-2022-01	If message is that activity has increased you need to show what it is normally like, e.g previous 6 months to last 6 months	Probably obvious but do you say red dots are earthquake epicentres ?	Comparison to normal		1		H
8	TP-2022-01	Interesting use of ‘picks up’ instead of increasing – but message is clear.	Clearly shows earthquakes the use of the polygon indicates which eqs the story is focusing on	Unsure whether comparisons are made to showcase how much of an increase has occurred. Depth discussed but less than 30km – lots of variance within that zone.	I like the map used in this context and contrast with red dots.	3		J
8	TP-2022-01	There is no baseline here to show what normal looks like. I can’t tell if there has been an increase as it just shows eq	It is clear that eq happens, just not that there has been an increase	A way to see the base	Y	1		K
9	TP-2022-01	Title and sub-title explain content and provide messages	Key data identified, but two colours not necessary, possibly distracting. Axes labels clear		Colour is probably not required	3		A
9	TP-2022-01	Image tell story well	Label tells story well. Axis labels just work (size/readability)	All key data is there	Nice use of colour contrast	3		B
9	TP-2022-01	Pretty clear and puts 2022 into useful context	Bar chat is simple and easy to understand at a quick glance	Other year labels are not needed unless they are referred to in text. Axis labels are appropriate	Good use of red for 2022	3		C
9	TP-2022-01	Easy and clear to see	Clear	2nd sentence probably shouldn’t be in the header, its a bit of a clunky sentence. The label on the red bar is a bit annoying as it is different to the rest, perhaps better horizontal.	Clear	3		D
9	TP-2022-01	Message can be inferred from the figure and is stated in the caption and title.	Very clear. Labelling used well	Year missing from label axis Data source missing	Colour used well Contrast is good	3		E
9	TP-2022-01	Title, caption, visual all reinforce key message	Fairly high, I like the most recent year in red – if ongoing I’d add that.	How much of 2022 is included in this plot?	Font size should be bigger for everything– see visual 5.	3		F
9	TP-2022-01	Clear message	good	The map.		3		G
9	TP-2022-01	Much better !		Nice labels	good	3		H
9	TP-2022-01	Message clear and shows better link with graph then the previous example	Information is clear. Caption is reflective of the graph and singling out 2022 sequence is helpful.	na	Simple and easy to follow	3		J
9	TP-2022-01	Clear	Why does 2022 stand out, if it’s only the 4th most active? Maybe caption wording could be changed for clarification?	Clear	Red & blue look the same when printed in b/w, so doesn’t ‘stand out’	3		K
10	TP-2022-04	Title explains content, no message	Bar chart a good option, scale difficult as unrest not linea.r X-axis and tick labels bold so distracting. Colours valid, but a bit distracting. Y-axis correctly not required, labels clear	Text box helpful but could say “1800 years ago”, which is more easily understood	Contrast sufficient	2		A
10	TP-2022-04	Has no relationship to eq or deformation data as per VAB theme	Works well to show relative levels of unrest, but is off theme of key message.	Nice clear diagram, just off theme	Good contrasts	1.75	2- score given	B
10	TP-2022-04	Takes a little more time to read, but once understood it makes sense	Data lines are quite thin. Data lines are not really described with what quantitative data they are linked to. Almost trying to make qualitative data into quantitative.	Not sure why 2020 is in grey. No logo or source/author	Colours could be quite intense for some. Used appropriately to show level of unrest	2		C
10	TP-2022-04	Takes a bit longer, but once you look at all the aspects you can see what the image is showing	It’s a wee bit busy, but it is also showing lots of info in one image	Why was 2020 grey and not black?		3		D
10	TP-2022-04	Having gone back to the VAB, this visual is in a specific section “What does volcanic unrest mean?” and therefore I don’t think the “visual requirements” stated are fair. I think this shows the message.	Colour bars are clear. Labelling used well.	Could label axes?	Good contrast. Colour used well for different unrest levels	3		E
10	TP-2022-04	Very nice, like that most intense and recent periods labelled. Title figure reinforce each other.	Includes clear extra inform (last eruption)	2020 I think should just be black	Good colours	3		F
10	TP-2022-04	I don’t understand what you refer to in terms of magnitude, is that EQs, deformation or the magnitude of events or unrest periods?	It's clear to see the time periods in the different 3rds of the graph, but I am unsure of what the lines represent. Is this EQs or overall unrest for the volcano?	Missing info about what the bars represent.		1		G
10	TP-2022-04	good	good	good	good	3		H
10	TP-2022-04	Clear and concise, it contains more than one key message – minor volcanic unrest.	visual graph is reflective of minor unrest – it infers that readers will link eq and deformation with minor unrest. The ability to compare 2022 unrest with other unrest periods, especially with the moderate unrest is helpful.	New info: negligible and moderate unrest without explanation on what it is.	No issue	2		J
10	TP-2022-04	Clear	Unsure of what the scale means. What differentiates different unrest and what does it mean.	Last eruption seems unnecessary	Colours are distinguishable as something different when printed in b/w	2		K
11	TP-2022-06	No title, but caption explains content	Appropriate graph type. Axes labels clear, except top axis (cropped from larger visual?). Missing data episode not labeled, but captioned. Vertical dashed line not explained. Uplift rate clear and labeled	Logo distracting, too large	Plenty of contrast	2		A
11	TP-2022-06	Message is subtle, new trend is not easy to see without the trend line	Dots show clearly data points. Axis on y (time) is confusing Trend line is good	Key information is there. Month labels are confusing	Nice clear colour contrast	2.25	2+ score given	B
11	TP-2022-06	Not really clear from first glance what the graph is showing. Caption does give some detail Not clear it is uplift	Not sure what the dashed line means. Could show mean/average trend line with uncertainty buffer.	Multiple axes are hard to read and confusing. No title. Chart clutter kept to minimum though. Explanation of gap between 2021 and should be added onto graph	Colour/contrast looks good	2		C
11	TP-2022-06	Semi-clear	The vertical hashed line makes it seem like that section is showing a different view Maybe the data gap could have been made into a smaller grey area with ‘no data’	Assuming the straight line = median = 63mm/yr? Perhaps this needed to be in the previous section as well?		2		D
11	TP-2022-06	Message can be inferred from the figure but is not labelled on the figure, but is stated in the caption.	Symbols are clear. Could label the non-operational period. Trend is shown and rate, but not really labelled	Label horizontal axes with year and month. Data source missing Vertical line not helpful (although maybe would be if part of a pair)	Good contrast	2		E
11	TP-2022-06	No title clearly stating what and so what. Caption overly wordy and key bits should be in figure for ease of message. E.g. horomatangi reef could be in title, not operational could simply be text at bottom of figure.	Trend drawn and labelled – good	Use consistent GNS logo (if GNS logo should Geonet be present). Dashed line not labelled. Prefer Jan YYYY labels on bottom to unclear J, M, S labelling.	Point size of data good, colour easy	2		F
11	TP-2022-06	Yes a clear message	The overall graph and info is easy to understand	Not sure what ticks and labels are at the top of the graph		3		G
11	TP-2022-06	Needs labels, general subsidence, versus distinct uplift	Vertical scale is confusing. Dotted line is confusing. Missing data is confusing	Do people know where horomatangi reef is ?		1		H
11	TP-2022-06	Message itself is clear, but could describe type of unrest being discussed (uplift at Horomatangi reef).	While the caption is straight forward, the reference to ‘scatter in observations’ is a bit confusing and maybe not clear visually.	Unsure what ‘J, M, S’ stands for	Colour is fine	1		J
11	TP-2022-06	Caption makes data collection method seem unreliable?	Y	N	?	3		K
12	WI-2012-16	No title, but caption explains content	Combined image so feature and context clear	Lines a little distracting, but required	Not applicable	3		A
12	WI-2012-16	Pictures tell story	No labels on image to help reader	No scales. No logo	Nice clear images to tell story.	2.25	2+ score given	B
12	WI-2012-16	Not clear what the image focus is. Spiny dome should be prominent or labeled	Image is ok, spiny dome should be highlighted to help reader. Where is it compared to the rest of Whakaari?	Labels, title, source and volcano name are missing. No author of the photo added	All ok – little dark	1		C
12	WI-2012-16	Good clear image	Only improvement would be to either circle the dome, or add in ‘Spiny lava dome’ into the caption			3		D
12	WI-2012-16	Message can be inferred from the photo but is not labelled in the photo, but is stated in the caption.	Dome is not labelled (although zoom in does help)	The wide-up photo could be smaller and the close-up view bigger.	Colour photo appropriate	2		E
12	WI-2012-16	Title (similar to or exactly VAB message) should run through this. Insets should clarify what we’re looking at (e.g. Whakaari). Could circle and label spiny lava dome.	I do like the zoomed out/zoomed in inset – could have improved visual 3	No title or text to help interpret at all. No date info.	Colour is what colours are	1.5		F
12	WI-2012-16	The messaging probably needs some explanation what a dome is	I can’t really tell what I am looking at. To me it looks like a steam vent.	Missing a before and after shot. More explanation about what a dome is.		1		G
12	WI-2012-16	Why are you showing us this ? Is this worrying ?	Lava dome needs arrow label			2		H
12	WI-2012-16	No issue with the message	Info and data is in alignment with message and caption		Photos are great	3		J
12	WI-2012-16	Would benefit from a before photo	Y	N	?	2		K
13	WI-2015-01	No title, monitoring product labels what data are shown	No labels or annotation added to data. Data not easily understood. Axes labels okay, but not explained		Colours standard for this product, but don’t highlight anything	1		A
13	WI-2015-01	Very subtle, no way to measure change related to past activity	Shows the banding, but not the slight increase on volcanic unrest	No time series to show past v now level of activity	Clear contrast, shows data but not the key message	2		B
13	WI-2015-01	Not clear what this is showing unless caption is read. Takes a few mins to understand and some people may not be able to read/understand without description.	Time period where EQs increase could be highlighted	Title missing. Source added on side	Ok, if not a bit busy. The different colours can look like they mean different things, but I know are the same	2		C
13	WI-2015-01	Tricky to see what people should be looking at, auto colour changes on the drum don’t help. What is banding?	Needs a comparison to see what we usually view on the drum vs this increase in activity (aka wiggly mess haha)			1		D
13	WI-2015-01	Message is not clear from the figure or caption.	“Banding” not labelled on the figure. Not explained what the data is (i.e., amplitude).	People might not know how to read the drum plot (e.g., where the timestamp is). Drum plot during little unrest for comparison.	Contrast sufficient.	1		E
13	WI-2015-01	Terribly unclear, doesn’t show increased activity at all (no comparison). Title should describe figure. Complete re-do – maybe plot tremor intensity with time?	seismic site, timing info present, but in a specialist, convoluted fashion. Labels easy to read	Banding? How can anybody not a seismologist see that (and even then)	Colours are ok, I like the purples here	1		F
13	WI-2015-01	I understand what you are trying to say, but I don’t think it comes across in the visuals.	This looks like a TV screen with snow on it. Unsure how the squiggly lines represent tremors and EQs. To me it looks like there has been a constant ongoing EQ for the last 24 hours.		I'm not sure why there are lighter purple coloured lines.	1		G
13	WI-2015-01	Very hard to interpret squiggles and axes for those not used to it	Again needs arrows or label			1		H
13	WI-2015-01	Could have more info on level of volcanic unrest – still minor and what timeframe is it referring too?	The visual is showing a change in tremor intensity over a 24hour period? This assumes that comparison is only made within this 24 hour window rather than at another point in time?	Requires a bit of thinking to follow the visual.	Fine	1		J
13	WI-2015-01	Not clear	This direct export from the GNS data is not user friendly at all	Unnecessary visual	Very hard to understand, especially in b/w	2		K
14	WI-2016-07	No title, but caption explains content adequately	Photograph shows what is described, though meaning not obvious	Annotation, would have improved understanding	Not applicable	2		A
14	WI-2016-07	Clear image but maybe subtle message about the damage/force of eruption.	Photo shows impact, how ever reader may not realise peg should be vertical	Could have arrow to show direction of blast. Logo	Image is clear	2		B
14	WI-2016-07	Again, caption needs to be read to know what is going on	No indication of where this is in relation to the vent. Caption could be more explanatory (e.g. impacts of April 27 eruption).	No source of photo. No logo. No title	Poor resolution, but that may be the copy shown here	1		C
14	WI-2016-07	Takes a bit to try and figure out what you are looking at	Another where ‘before’ and ‘after’ would be handy			2		D
14	WI-2016-07	Difficult to infer message from photograph but it is implied by the caption.	I wouldn’t know what peg would have looked like before the eruption so hard to tell how it has been impacted by the eruption.	Not obvious it is related to the eruption.	Colour photograph appropriate.	1		E
14	WI-2016-07	No title. VAB message unclear.	Totally unclear – even the scale isn’t readable	Could have a zoomed out/zoomed in combo image to help. Maybe a map to help put this location in context. Missing title, missing anything to help interpret.		1		F
14	WI-2016-07	Message is clear	good	What was there before. It would be good to know what snapped off to get a scale of the force needed.		2		G
14	WI-2016-07	Not obvious on what is peg versus scale and what ped normally looks like	Needs labels this could be a photo from any beach in the world !	Needs more info		1		H
14	WI-2016-07	Good message	Pic indicates the force of the blast which as per caption indicates it was snapped off during the eruption.	Measuring tape, interesting but gives us insight to see how force of the blast might be measured		2		J
14	WI-2016-07	Y	Y	Should information from the measuring tape be included in the caption?	Y	3		K
15	WI-2024-18	No title, but caption explains content in detail	Axes tick labels okay, x-axis label not required. Error bars not required, distracting. Legend not required. Eruption information provides context for data	Logo distracting, too large	Contrast sufficient, except perhaps for error bars	3		A
15	WI-2024-18	Figure shows data clearly and the relationship to past eruptive activity	Data points clear Labels clear Key clear	Error bars are very subtle, not needed. Y-axis only have ticks for yrs (not 6mths). Don’t need ‘date’ label	Good colour contrasts	3		B
15	WI-2024-18	Trend seen nicely. Title missing which would help with message. Annotation or trend arrow could help.	Data made sense and described in legend. 2024 data a bit cramped and not easy to see.	Not sure if all of the time series is needed. Could it not go back to 2016? Title missing. Date in X axis not needed.	Contrast could be checked, but looks ok.	3		C
15	WI-2024-18	Pretty clear to see the message	Almost need more space on the right so you can clearly see the whole dots, they are cut in half	Title would be nice		3		D
15	WI-2024-18	Message can be inferred from the figure but is not labelled on the figure, but is stated in the caption.	Data markers are clear. Trend (i.e., increased gas emissions) is not labelled and is almost cut off on the right-hand side, making it hard to see. Eruptive activity vs. ash emissions might not be clear to people. Flux used on axes, which might not be associated with emission by everyone.	Length of time shown is probably longer than needed for the VAB message – perhaps only needed 2024 data. Data source (Tilde) missing.	Colour use is appropriate – no special significance. Contrast sufficient	2		E
15	WI-2024-18	No title, should clearly state key points. Legend, data at least convey right message.	Legend at least explains the key point indirectly (ongoing high gas and eruptive activity)	Sulfur dioxide should be SO2, and inside brackets on y axis. Date – I prefer Jan YYYY labels Doesn’t state Whakaari anywhere.	Text could be bigger, but readable to me	2		F
15	WI-2024-18	Clear message	good			3		G
15	WI-2024-18	Pretty good				3		H
15	WI-2024-18	Message is specifically targeting information from gas flight. Great.	Shows the differences in eruptive activity overtime and its relationship with gas flux.	Did gas measures get better over time – recent eruptive activity and gas flux show better correlation as opposed to the previous two eruptive periods.	No issues	2		J
15	WI-2024-18	Y	2016 had an eruption period, but there were higher gas flux’s in 2019 but no eruptive period?	Y	Y	2		K
