# Supplementary material
Source: Research Square preprint supplement (doi:10.21203/rs.3.rs-9174409/v1)
Supplement: Supplementary file 3 [file e40fb6922a6994638d5c74ed.xlsx]

## Sheet: Ruapehu
Id	Date	Nproduct	Nbespoke	Nphoto-video	Nscience-data	Nhazard-risk	Title
2011/01	Mar 7 2011	0	1	0	1	0	Ruapehu Volcano – Update Crater Lake heating; Alert Level Remains at 1
2011/02	Apr 5 2011	0	0	0	0	0	Ruapehu Volcano – Update Crater Lake remains hot Volcanic Alert Level remains at 1 Aviation Colour Code changed to Yellow
2011/03	Apr 18 2011	0	0	0	0	0	Ruapehu Volcano – Update Crater Lake slowly cooling Alert Level remains at 1 Aviation Colour Code remains at Yellow
2011/04	May 2 2011	0	0	0	0	0	Ruapehu Volcano – Update Crater Lake slowly cooling Alert Level remains at 1 Aviation Colour Code returns to Green
2011/05	Oct 10 2011	0	0	0	0	0	Ruapehu Volcano – Update Volcanic Alert Level 1 Aviation Colour Code Green
2012/01	Nov 16 2012	0	0	0	0	0	Increased likelihood of eruptions at Ruapehu
2012/02	Nov 22 2012	0	0	0	0	0	Likelihood of eruptions at Ruapehu remains
2012/03	Nov 23 2012	0	0	0	0	0	Likelihood of eruption at Ruapehu still remains
2012/04	Dec 3 2012	0	0	0	0	0	Ruapehu still at heightened level of unrest
2012/05	Dec 12 2012	0	0	0	0	0	Ruapehu Heightened Unrest Continues
2013/01	Mar 3 2013	0	0	0	0	0	Ruapehu unrest continues, apparent deep temperatures show decline
2013/02	Mar 12 2013	0	0	0	0	0	Ruapehu: Aviation Colour Code down to Green. Volcanic Alert Level remains at 1
2013/03	Apr 9 2013	0	0	0	0	0	Ruapehu: Update, Crater Lake starts heating
2013/04	May 22 2013	0	0	0	0	0	Ruapehu Crater Lake Back to Normal
2014/01	Dec 3 2014	0	0	0	0	0	Ruapehu: Crater Lake records lowest temperature since 2010
2015/01	Jan 30 2015	0	0	0	0	0	Ruapehu: Crater Lake heating phase reaches peak
2015/02	Apr 29 2015	0	0	0	0	0	Ruapehu: Crater Lake heating and intermittent volcanic tremor
2015/03	May 11 2015	0	0	0	0	0	Intermittent volcanic tremor declines as Ruapehu Crater Lake starts to cool
2016/01	Apr 29 2016	0	0	0	0	0	Volcanic Earthquake Swarm and Lake Heating at Ruapehu Crater Lake
2016/02	May 3 2016	0	0	0	0	0	Mt Ruapehu - Volcanic earthquake swarm declines, lake stops heating
2016/03	May 7 2016	0	0	0	0	0	Mt Ruapehu - Crater Lake surface activity reported, lake heats further
2016/04	May 11 2016	0	0	0	0	0	Volcanic gas output increases at Ruapehu, Volcanic Alert Level raised to Level 2
2016/05	May 17 2016	0	0	0	0	0	Crater Lake show signs of cooling; Volcanic Alert Level remains Level 2
2016/06	Jun 7 2016	0	0	2	2	0	Ruapehu Crater Lake cooling stops; Volcanic Alert Level remains at Level 2
2016/07	Jul 5 2016	0	0	0	0	0	Volcanic Alert Level lowered to Level 1 for Mt Ruapehu
2016/08	Aug 15 2016	0	0	2	2	0	Mt Ruapehu Crater Lake is now cool, volcanic unrest still low
2016/09	Sep 30 2016	0	0	1	1	0	Mt Ruapehu Crater Lake: Steam plumes as lake heats
2016/10	Oct 31 2016	0	0	1	1	0	Mt Ruapehu: Seismic activity increases after lake temperature peaks
2017/01	Nov 25 2017	0	0	0	0	0	High volcanic gas emission and Crater Lake (Te Wai Ā-Moe) temperature at Mt Ruapehu
2017/02	Nov 28 2017	0	0	0	0	0	Slight changes in water and gas composition of the Crater Lake (Te Wai Ā-Moe) at Mt Ruapehu
2017/03	Dec 12 2017	0	0	0	0	0	Gas emission at Mt Ruapehu returns to normal
2018/01	Mar 19 2018	1	0	1	2	0	Slight increase in seismic activity at Mt Ruapehu
2018/02	Mar 26 2018	0	0	0	0	0	Minor seismic sequence over at Mt Ruapehu
2018/03	Jun 6 2018	0	0	0	0	0	A new heating cycle begins at Mt Ruapehu
2019/01	Apr 10 2019	0	0	0	0	0	Te Wai ā-moe, Mt Ruapehu: Increases in lake temperature and seismic activity
2019/02	Apr 29 2019	0	0	0	0	0	Te Wai ā-moe, Mt Ruapehu crater lake is starting to cool and seismic activity decreases
2019/03	Aug 26 2019	0	0	0	0	0	Mt Ruapehu crater lake (Te Wai ā-moe) is in a new heating cycle
2020/01	Feb 24 2020	0	0	0	0	0	Mt Ruapehu: Minor seismic activity recorded
2020/02	Mar 2 2020	0	0	0	0	0	Mt Ruapehu: Science update from seismic activity last week
2020/03	Mar 18 2020	0	0	0	0	0	Mt Ruapehu: Crater Lake heated to 40°C
2020/05	May 4 2020	0	0	0	0	0	Mt Ruapehu: Crater Lake is now cooling again
2020/06	May 26 2020	0	0	0	0	0	Mt Ruapehu: Activity and Crater Lake temperature update
2020/07	Aug 11 2020	0	0	0	0	0	Mt Ruapehu: Activity and Crater Lake temperature update. Volcanic Alert Level remains at Level 1
2020/08	Oct 13 2020	0	0	1	1	0	Mt Ruapehu status update: Minor volcanic unrest continues while Crater Lake temperature is low. Volcanic Alert Level remains at Level 1
2020/09	Nov 3 2020	0	0	0	0	0	Mt Ruapehu crater lake temperature is now rising; volcanic activity remains at low level
2020/10	Dec 21 2020	0	0	0	0	0	Mt Ruapehu: Crater Lake heating to over 40°C
2020/11	Dec 28 2020	0	0	0	0	0	Mt Ruapehu Crater Lake temperature down to 41 ̊C but volcanic tremor still elevated
2021/01	Jan 11 2021	0	0	0	0	0	Activity decreases at Mt Ruapehu. The Volcanic Alert Level is lowered to 1
2021/02	Apr 13 2021	0	0	0	0	0	Mt Ruapehu status update: volcanic activity remains at low level, Crater Lake (Te Wai ā-moe) at 40°C
2021/03	Jun 8 2021	0	0	0	0	0	Mt Ruapehu status update: volcanic activity remains at low level, Crater Lake (Te Wai ā-moe) down to 26°C
2021/04	Jul 12 2021	0	0	0	0	0	Mt Ruapehu status update: new heating phase starts at the crater lake (Te Wai ā-moe)
2021/05	Sep 28 2021	0	1	0	1	0	Mt Ruapehu status update: Crater Lake (Te Wai ā-moe) now cooling
2021/06	Dec 14 2021	0	1	0	1	0	Mt Ruapehu status update: Crater Lake (Te Wai ā-moe) is now heating
2022/01	Jan 12 2022	0	1	0	1	0	Recent earthquakes under the summit of Ruapehu – unrest remains low
2022/02	Mar 21 2022	0	0	0	0	0	Mt Ruapehu’s crater lake heating is accompanied by strong volcanic tremor. Volcanic Alert Level raised to Level 2
2022/03	Mar 28 2022	0	0	0	0	0	Strong tremor and Crater Lake heating continues at Mt Ruapehu. Volcanic Alert Level remains at Level 2
2022/04	Apr 5 2022	0	0	0	0	0	Mt Ruapehu volcanic tremor and Crater Lake heating continues. Volcanic Alert Level remains at Level 2
2022/05	Apr 12 2022	0	0	0	0	0	Mt Ruapehu elevated volcanic unrest continues. Volcanic Alert Level remains at Level 2
2022/06	Apr 20 2022	0	0	0	0	0	Volcanic gas detected and strong tremor continues at Mt Ruapehu: Volcanic Alert Level remains at Level 2
2022/07	Apr 26 2022	0	0	0	0	0	Mt Ruapehu strong volcanic tremor continues. Volcanic Alert Level remains at Level 2
2022/08	May 2 2022	0	0	0	0	0	Volcanic unrest continues at Mt Ruapehu marked by increased volcanic gas output and strong volcanic tremor: Volcanic Alert Level remains at Level 2
2022/09	May 3 2022	0	0	2	2	0	Steam plume visible at Mt Ruapehu, volcanic unrest continues: Volcanic Alert Level remains at Level 2
2022/10	May 11 2022	0	0	0	0	0	Heightened volcanic unrest continues at Mt Ruapehu with volcanic gas output, strong tremor and steam plumes: Volcanic Alert Level remains at Level 2
2022/11	May 17 2022	0	0	0	0	0	Volcanic tremor at Mt Ruapehu lowers from strong to moderate: Volcanic Alert Level remains at Level 2
2022/12	May 24 2022	0	0	0	0	0	Volcanic unrest continues at Mt Ruapehu as gas emissions remain elevated. The Volcanic Alert Level remains at Level 2
2022/13	Jun 3 2022	0	0	0	0	0	Mt Ruapehu volcanic unrest continues with moderate tremor and a cooler Crater Lake. The Volcanic Alert Level remains at Level 2
2022/14	Jun 7 2022	0	0	0	0	0	Lower level of activity at Mt Ruapehu. The Volcanic Alert Level remains at Level 2
2022/15	Jun 14 2022	0	0	0	0	0	Moderate volcanic unrest continues at Mt Ruapehu. The Volcanic Alert Level remains at Level 2
2022/16	Jun 20 2022	0	0	0	0	0	Short period of increased volcanic tremor over the weekend at Mt Ruapehu. The Volcanic Alert Level remains at Level 2
2022/17	Jun 28 2022	0	0	0	0	0	Ruapehu Crater Lake sampled, variable gas emissions and low volcanic tremor levels continue. The Volcanic Alert Level remains at Level 2
2022/18	Jul 4 2022	0	1	0	1	0	Level of unrest continues to decrease at Mt Ruapehu. The Volcanic Alert Level is lowered to 1
2022/19	Oct 5 2022	0	0	0	0	0	Volcanic unrest remains low at Mt Ruapehu. The Volcanic Alert Level remains at Level 1
2023/01	Jan 17 2023	0	0	0	0	0	Crater Lake temperature rise, volcanic unrest remains low for Mt Ruapehu. The Volcanic Alert Level remains at Level 1
2023/02	May 3 2023	0	1	0	1	0	Te Wai ā-moe (Crater Lake) is cooling, volcanic unrest remains low for Mt Ruapehu. The Volcanic Alert Level remains at Level 1
2023/03	Jul 31 2023	0	1	0	1	0	Te Wai ā-moe (Crater Lake) has stopped cooling at Mt Ruapehu. Volcanic activity remains low and the Volcanic Alert Level remains at Level 1
2023/04	Sep 5 2023	1	0	1	2	0	Te Wai ā-moe (Crater Lake) is now heating at Mt Ruapehu. Volcanic activity remains low, and the Volcanic Alert Level remains at Level 1
2023/05	Oct 18 2023	0	1	1	2	0	Mt Ruapehu’s Te Wai ā-moe (Crater Lake) is now cooling. Volcanic activity remains low, and the Volcanic Alert Level remains at Level 1
2023/06	Nov 27 2023	1	0	0	1	0	Earthquake activity recorded beneath Mt Ruapehu. Te Wai ā-moe (Crater Lake) slowly heating. Volcanic activity remains low, and the Volcanic Alert Level remains at Level 1
2024/01	Feb 2 2024	0	1	0	1	0	Te Wai ā-moe (Crater Lake) enters new heating episode at Mt Ruapehu. Volcanic activity remains low, and the Volcanic Alert Level remains at Level 1
2024/02	Mar 19 2024	0	2	0	2	0	Te Wai ā-moe (Crater Lake) heating episode is over at Mt Ruapehu. Volcanic activity remains low, and the Volcanic Alert Level remains at 1
2024/03	Mar 26 2024	0	0	0	0	0	Uncommon style of earthquake activity at Mt Ruapehu. Volcanic activity remains low, and the Volcanic Alert Level remains at 1
2024/04	Apr 9 2024	0	0	0	0	0	Unusual style of earthquake activity continues at Mt Ruapehu, no changes in overall volcanic activity. The Volcanic Alert Level remains at 1
2024/05	Jun 6 2024	0	0	0	0	0	Minor volcanic unrest continues at Mt Ruapehu. Volcanic Alert Level remains at 1
2024/06	Aug 29 2024	0	1	0	1	0	Minor volcanic unrest continues at Mt Ruapehu as lake cools. Volcanic Alert Level remains at 1
2024/07	Oct 8 2024	0	1	0	1	0	Minor volcanic unrest continues at Mt Ruapehu as lake remains cool. Volcanic Alert Level remains at 1
2024/08	Oct 31 2024	0	0	0	0	0	Minor volcanic unrest continues at Mt Ruapehu as lake temperature slowly increases. Volcanic Alert Level remains at 1
2024/09	Dec 20 2024	0	0	0	0	0	Mt Ruapehu Crater Lake starts heating - minor volcanic unrest continues. Volcanic Alert Level remains at 1

## Sheet: Whakaari-WhiteIsland
Id	Date	Nproduct	Nbespoke	Nphoto-video	Nscience-data	Nhazard-risk	Title
2012/01	Aug 2 2012	0	0	3	3	0	White Island Volcano Update: Crater Lake begins to re-fill; volcanic gases and tremor increase
2012/02	Aug 6 2012	0	0	3	3	0	White Island Volcano Update: Volcano camera catches small night eruption, volcanic tremor continues. Volcanic Alert Level raised to Level 2, Aviation Colour Code changed to Orange
2012/03	Aug 8 2012	1	0	0	0	1	White Island update – First Ash Emissions since 2000
2012/04	Aug 9 2012	1	0	0	0	1	No title
2012/05	Aug 9 2012	0	0	0	0	0	White Island update – ash emissions confirmed
2012/06	Aug 10 2012	1	0	0	0	1	White Island Update
2012/07	Aug 10 2012	1	0	0	0	1	White Island Update
2012/08	Aug 12 2012	1	0	0	0	1	White Island Update
2012/09	Aug 13 2012	1	0	0	0	1	White Island Update
2012/10	Aug 13 2012	1	0	0	0	1	White Island Update
2012/11	Aug 14 2012	1	0	0	0	1	White Island Update
2012/12	Aug 15 2012	1	0	0	0	1	White Island Update
2012/13	Aug 16 2012	1	0	0	0	1	White Island Update
2012/14	Aug 17 2012	0	0	0	0	0	White Island Volcanic Alert Level Reduced to 1
2012/15	Aug 27 2012	0	0	0	0	0	White Island: update
2012/16	Dec 12 2012	0	0	3	3	0	Spiny Lava Dome – A New and Unusual Style of Eruptive Activity At White Island
2012/17	Dec 20 2012	0	0	0	0	0	No change to Lava Dome on White Island
2013/01	Jan 7 2013	0	0	1	1	0	Alert Level at White Island lowered. Lava dome eruption episode now over Volcanic Alert Level has changed from 2 to 1 Aviation Colour Code has changed from Orange to Yellow
2013/02	Jan 22 2013	0	0	2	2	0	Volcanic Unrest increases
2013/03	Jan 24 2013	0	0	0	0	0	White Island update: Volcanic unrest increases, aviation colour code changed
2013/04	Jan 25 2013	0	0	1	1	0	No increase in degassing at White Island
2013/05	Jan 29 2013	0	0	0	0	0	Recent change in seismic activity at White Island
2013/06	Jan 30 2013	0	0	0	0	0	White Island Update; small tuff cone forming
2013/07	Jan 31 2013	0	0	0	0	0	Minor increases in gas flux at White Island
2013/08	Feb 11 2013	0	0	0	0	0	Ash Hazard for Aviation at White Island Reduced: Aviation Colour Code Lowered to Yellow; Volcanic Alert Level Unchanged at 1
2013/09	Feb 23 2013	0	0	0	0	0	No title
2013/10	Feb 25 2013	0	0	0	0	0	White Island update: Volcanic unrest continues
2013/11	Mar 4 2013	0	0	1	1	0	White Island Volcano Alert Level reduced to 1. Aviation Colour Code to Yellow
2013/12	Mar 26 2013	0	0	0	0	0	White Island Resumes Pattern of Minor Activity Volcano Alert Level and Aviation Colour Code Unchanged
2013/13	Apr 29 2013	0	0	1	1	0	Aviation colour code changed from Yellow to Green White Island low level volcanic activity persists Volcano Alert Level remains at 1
2013/14	Jul 26 2013	0	0	0	0	0	White Island Resumes Pattern of Minor Activity Aviation Colour Code raised to Yellow
2013/15	Aug 5 2013	0	0	0	0	0	White Island Minor Activity Declines Aviation Colour Code lowered to Green
2013/16	Aug 20 2013	0	0	0	0	0	White Island erupted – Alert raised to 2 from 1, Aviation Colour Code raised to Red from Green
2013/17	Aug 20 2013	0	0	0	0	0	White Island Eruption Information Update – Alert remains at 2, Aviation Colour Code lowered to Orange from Red
2013/18	Aug 21 2013	0	0	0	0	0	Update: quiet night at White Island
2013/19	Aug 21 2013	0	0	0	0	0	Volcanic Alert Level down to 1 at White Island
2013/20	Aug 26 2013	0	0	0	0	0	White Island Remains Quiet
2013/21	Oct 7 2013	0	0	2	2	0	White Island activity update
2013/22	Oct 8 2013	0	0	0	0	0	White Island activity update
2013/23	Oct 12 2013	0	0	0	0	0	White Island Activity and Alert Level change
2013/24	Oct 14 2013	0	0	2	2	0	White Island activity update
2013/25	Oct 21 2013	0	0	0	0	0	White Island: Volcanic Alert Level lowered, Level 1
2013/26	Dec 23 2013	0	0	0	0	0	Aviation Colour Code lowered to Green at Whakaari / White Island. Volcanic Alert Level remains at 1
2013/27	Dec 23 2013	0	0	0	0	0	Update of activity, Whakaari / White Island. Volcanic Alert Level remains at 1
2014/01	Jan 22 2014	1	0	0	1	0	Update of activity, Whakaari / White Island. Volcanic Alert Level remains at 1
2014/02	Feb 11 2014	0	0	1	1	0	Update on activity and volcano monitoring at Whakaari / White Island. Volcanic Alert Level remains at 1
2014/03	Aug 28 2014	0	0	0	0	0	Volcanic Alert Bulletin: WI – 2014/03 Earthquake activity near Whakaari / White Island
2014/04	Oct 6 2014	0	0	0	0	0	Volcanic Alert Bulletin: WI – 2014/04 White Island (Whakaari) 6 October 2014
2015/01	Oct 13 2015	1	0	0	1	0	Slight increase in volcanic unrest at White Island (Whakaari)
2015/02	Nov 2 2015	0	0	0	0	0	Slight decrease of volcanic unrest at White Island (Whakaari)
2015/03	Dec 10 2015	0	0	1	1	0	Minor volcanic unrest continues at White Island (Whakaari)
2016/01	Apr 27 2016	0	0	1	1	0	White Island Crater Lake level drops, unrest continues
2016/02	Apr 28 2016	0	0	2	2	0	Minor White Island Eruption - Wednesday Evening
2016/03	Apr 28 2016	0	0	0	0	0	White Island Alert Level Lowered to 2
2016/04	Apr 30 2016	0	0	1	1	0	Aerial observations confirm site of new crater and gas output at White Island (Whakaari)
2016/05	May 2 2016	0	0	0	0	0	Aviation Colour Code changed, volcanic unrest remains unchanged at White Island
2016/06	May 9 2016	0	0	0	0	0	Volcanic Alert Level at White Island lowered to level 1
2016/07	May 25 2016	1	0	5	6	0	Volcanic unrest continues at Whakaari/White Island; details of April 27 eruption unraveling
2016/08	Sep 13 2016	0	0	0	0	0	Minor Eruptive Volcanic activity observed at Whakaari/White Island : Volcanic Alert Level raised to Level 3
2016/09	Sep 13 2016	1	0	2	3	0	Minor Eruptive Volcanic Activity Observed at Whakaari/White Island : Update
2016/10	Sep 14 2016	0	0	0	0	0	Minor Eruptive Activity at Whakaari/White Island: Update
2016/11	Sep 15 2016	0	0	0	0	0	End of Minor Eruptive Activity at White Island (Whakaari)
2016/12	Sep 19 2016	0	0	0	0	0	Whakaari/White Island: Alert Level lowered to Level 1
2017/01	3 Apr 2017	0	0	0	0	0	White Island (Whakaari): Volcano remains quiet, moderate gas emissions
2018/01	May 30 2018	0	0	0	0	0	White Island (Whakaari): Lake level rises
2018/02	Jul 4 2018	0	0	0	0	0	White Island (Whakaari): Rising Crater Lake may cause hydrothermal surface activity
2019/01	Apr 16 2019	0	0	0	0	0	Whakaari/White Island crater lake level drops and is unlikely to overflow
2019/02	May 26 2019	0	0	0	0	0	Local earthquake swarm near Whakaari/White Island
2019/03	Jun 4 2019	0	0	0	0	0	Earthquake activity near Whakaari/White Island decreases
2019/04	Jun 20 2019	0	0	0	0	0	New earthquake swarm at Whakaari/White Island
2019/05	Jun 26 2019	0	0	0	0	0	Whakaari/White Island Volcanic Alert Level raised to Level 2
2019/06	Jul 1 2019	0	0	0	0	0	Whakaari/White Island Volcanic Alert Level lowered to 1
2019/07	Sep 26 2019	0	0	0	0	0	Whakaari/White Island steam-driven activity increases
2019/08	Oct 30 2019	0	0	0	0	0	Whakaari/White Island: Background activity increases
2019/09	Nov 18 2019	0	0	0	0	0	Whakaari/White Island: Background activity increases further
2019/10	Nov 25 2019	0	0	0	0	0	Whakaari/White Island: Moderate volcanic unrest continues
2019/11	Dec 3 2019	0	0	0	0	0	Whakaari/White Island: Moderate volcanic unrest continues
2019/12	Dec 9 2019	0	0	0	0	0	Eruption occurred at White Island
2019/13	Dec 9 2019	0	0	0	0	0	Whakaari/White Island eruption: an update
2019/14	Dec 10 2019	0	0	0	0	0	Whakaari/White Island eruption: Update #2
2019/15	Dec 10 2019	0	0	0	0	0	Whakaari/White Island eruption: update #3
2019/16	Dec 11 2019	0	0	0	0	0	Whakaari/White Island eruption: Update #4
2019/17	Dec 11 2019	0	0	0	0	0	Whakaari/White Island eruption: Update #5
2019/18	Dec 12 2019	0	0	0	0	0	Whakaari/White Island eruption: Update #6 - Volcanic Alert Level is reduced to Level 2
2019/19	Dec 12 2019	0	0	0	0	0	Whakaari/White Island eruption: Update #7
2019/20	Dec 13 2019	0	0	0	0	0	Whakaari/White Island eruption: Update #8
2019/21	Dec 13 2019	0	0	0	0	0	Whakaari/White Island eruption: Update #9
2019/22	Dec 14 2019	0	0	0	0	0	Whakaari/White Island eruption: Update #10
2019/23	Dec 15 2019	0	0	0	0	0	Whakaari/White Island eruption: Update #11
2019/24	Dec 16 2019	0	0	0	0	0	Whakaari/White Island eruption: Update #12
2019/25	Dec 17 2019	0	0	0	0	0	Whakaari/White Island eruption: Update #13
2019/26	Dec 18 2019	0	0	0	0	0	Whakaari/White Island eruption: Update #14
2019/27	Dec 19 2019	0	0	0	0	0	Whakaari/White Island eruption: Update #15
2019/28	Dec 20 2019	0	0	0	0	0	Whakaari/White Island eruption: Update #16
2019/29	Dec 23 2019	0	0	0	0	0	Whakaari/White Island eruption: Update #17
2020/01	Jan 6 2020	0	0	0	0	0	Whakaari/White Island eruption: Update #18
2020/02	Jan 15 2020	0	0	0	0	0	Whakaari/White Island: Update #19
2020/03	Jan 22 2020	0	0	0	0	0	Whakaari/White Island: Update #20
2020/04	Feb 4 2020	0	0	0	0	0	Whakaari/White Island: Elevated volcanic unrest continues in steady state
2020/05	Feb 19 2020	0	0	0	0	0	Whakaari/White Island: Elevated volcanic unrest continues
2020/06	Mar 10 2020	0	0	0	0	0	Whakaari/White Island: Recent observations confirm continued elevated volcanic unrest
2020/07	Apr 16 2020	0	0	0	0	0	Whakaari/White Island: Elevated volcanic unrest continues
2020/08	May 29 2020	0	0	0	0	0	Whakaari/White Island: Monitoring and activity update
2020/09	Jun 9 2020	0	0	0	0	0	Whakaari/White Island: New activity update, elevated unrest continues
2020/10	Jun 16 2020	0	0	0	0	0	Whakaari/White Island: Volcanic Alert Level lowered to Level 1, minor volcanic unrest continues
2020/11	Jun 22 2020	0	0	0	0	0	Whakaari/White Island: Minor volcanic unrest continues. Aviation Colour code changed to Green, Volcanic Alert Level remains Level 1
2020/12	Jul 30 2020	0	0	0	0	0	Whakaari/White Island: Minor volcanic unrest continues. Volcanic Alert Level remains at Level 1
2020/13	Sep 15 2020	0	0	0	0	0	Whakaari/White Island: Activity update. Minor volcanic unrest continues. Volcanic Alert Level remains at Level 1
2020/14	Nov 13 2020	0	0	0	0	0	Minor ash emission at Whakaari/White Island. Volcanic Alert Level raised to Level 2
2020/15	Nov 17 2020	0	0	1	1	0	Ash emission continues at Whakaari/White Island. Volcanic Alert Level remains at Level 2
2020/16	Dec 1 2020	0	0	0	0	0	Ash emission has reduced at Whakaari/White Island. Volcanic Alert Level remains at Level 2
2020/17	Dec 7 2020	0	0	0	0	0	Ash emission has stopped at Whakaari/White Island. Volcanic Alert Level is lowered to Level 1
2020/18	Dec 30 2020	0	0	0	0	0	Small steam explosions recorded at Whakaari/White Island
2021/01	Feb 3 2021	0	0	0	0	0	Year-long monitoring reveals declining vent temperatures at Whakaari/White Island
2021/02	Feb 19 2021	0	0	0	0	0	Minor steam explosions at Whakaari/White Island
2021/03	Mar 15 2021	0	0	0	0	0	Further minor tremor and steam bursts, explosions
2021/04	May 4 2021	0	0	0	0	0	Minor volcanic unrest continues at Whakaari/White Island
2021/05	Jun 9 2021	0	0	0	0	0	Minor volcanic unrest continues at Whakaari/White Island
2021/06	Jul 21 2021	0	0	0	0	0	Increased heat flow confirms ongoing volcanic unrest at Whakaari/White Island
2021/07	Jul 26 2021	0	0	0	0	0	Continued heat flow and changes in gas composition indicate increased unrest at Whakaari/White Island. Volcanic Alert Level raised to Level 2
2021/08	Aug 9 2021	0	0	0	0	0	Ongoing high heat flow from Whakaari/White Island. Volcanic Alert Level remains at 2
2021/09	Aug 24 2021	0	0	0	0	0	Minor, short-lived ash emission from Whakaari/White Island. Volcanic Alert Level remains at 2
2021/10	Sep 2 2021	0	0	0	0	0	Persistent low-level ash emission from Whakaari/White Island. Volcanic Alert Level remains at 2
2021/11	Sep 6 2021	0	0	0	0	0	Whakaari/White Island: Ash emissions reduced, night glow continues
2021/12	Sep 14 2021	0	0	0	0	0	Whakaari/White Island: Intermittent weak ash emissions continue
2021/13	Sep 27 2021	0	0	0	0	0	Whakaari/White Island: Notable cooling of vent area
2021/14	Oct 18 2021	0	0	1	1	0	Whakaari/White Island: Volcanic unrest continues, lower gas emission and steady active vent temperatures
2021/15	Nov 9 2021	0	0	1	1	0	Whakaari/White Island: Volcanic unrest continues, increased gas emission, steady active vent temperatures and lake level rise
2021/16	Nov 23 2021	0	0	1	1	0	Whakaari/White Island: Volcanic unrest continues with steam and mud discharge, decreased gas emissions, steady vent temperatures and lake level fall
2021/17	Dec 14 2021	0	0	1	1	0	Whakaari/White Island: Volcanic unrest continues with vent temperature rise
2022/01	Jan 18 2022	0	0	0	0	0	Whakaari/White Island: Vent temperature and gas output decreases; volcanic unrest continues
2022/02	Feb 15 2022	0	0	0	0	0	Whakaari/White Island: Volcanic unrest continues with some minor ash emission and geyser
2022/03	Feb 23 2022	0	0	2	2	0	Whakaari/White Island: Volcanic unrest continues with some minor ash emission and vent changes
2022/04	Mar 23 2022	0	0	1	1	0	Whakaari/White Island: Volcanic unrest continues with some crater changes
2022/05	Apr 4 2022	0	0	0	0	0	Whakaari/White Island: Volcanic Alert Level lowered to Level 1, minor volcanic unrest continu
2022/06	May 9 2022	0	0	0	0	0	Whakaari/White Island: Minor volcanic unrest continues. Volcanic Alert Level remains Level 1
2022/07	Jun 28 2022	0	0	0	0	0	Whakaari/White Island: Update on recent observations. Minor volcanic unrest continues. Volcanic Alert Level remains Level 1
2022/08	Aug 10 2022	0	0	0	0	0	Whakaari/White Island: Loss of near real-time monitoring. Minor volcanic unrest continues. Volcanic Alert Level remains Level 1
2022/09	Sep 7 2022	0	0	0	0	0	Whakaari/White Island: Volcanic Alert Level raised to Level 2 due to loss of real-time monitoring capability and increased uncertainty
2022/10	Sep 19 2022	0	0	1	1	0	Whakaari/White Island: Minor volcanic ash and strong gas signal observed on Sunday, Volcanic Alert Level remains at Level 2
2022/11	Sep 30 2022	0	0	1	1	0	Whakaari/White Island: No further volcanic ash emission or gas signals, Volcanic Alert Level remains at Level 2
2022/12	Oct 10 2022	0	0	1	1	0	Whakaari/White Island: Active vent creates minor ash emission. Volcanic Alert Level remains at Level 2
2022/13	Oct 26 2022	0	0	1	1	0	Whakaari/White Island: Minor ash emission continues. Volcanic Alert Level remains at Level 2
2022/14	Dec 12 2022	0	0	1	1	0	Whakaari/White Island: Minor-moderate steam and gas emissions continue. Volcanic Alert Level remains at Level 2
2023/01	Jan 24 2023	0	0	1	1	0	No change in activity at Whakaari/White Island as gas emissions continue. Volcanic Alert Level remains at Level 2
2023/02	Mar 10 2023	0	0	2	2	0	Whakaari/White Island continues to emit significant amounts of gas and steam. Volcanic Alert Level remains at Level 2
2023/03	May 23 2023	0	0	1	1	0	Whakaari/White Island continues to emit gas and steam. The Volcanic Alert Level remains at Level 2
2023/04	Jul 20 2023	0	0	1	1	0	Minor steam and gas emissions continue at Whakaari/White Island. The Volcanic Alert Level remains at Level 2
2023/05	Oct 10 2023	0	0	2	2	0	Low level steam and gas emissions continue at Whakaari/White Island. The Volcanic Alert Level remains at Level 2
2023/06	Dec 19 2023	0	0	1	1	0	Low level steam and gas emissions continue at Whakaari/White Island. Lake level decreases. The Volcanic Alert Level remains at Level 2
2024/01	Feb 12 2024	0	0	1	1	0	Minor geysering, low level steam and gas emissions continue at Whakaari/White Island. The Volcanic Alert Level remains at Level 2
2024/02	Apr 3 2024	0	0	1	1	0	Whakaari/White Island continues to emit low levels of volcanic gas and steam accompanied by hydrothermal activity. The Volcanic Alert Level remains at Level 2
2024/03	May 24 2024	0	0	0	0	0	Minor Volcanic Eruption at Whakaari/White Island
2024/04	May 24 2024	0	0	2	2	0	No further eruptive activity at Whakaari/White Island. Volcanic Alert Level lowered to Level 2 and Aviation Colour Code lowered to Yellow
2024/05	May 25 2024	0	0	0	0	0	Minor Volcanic Eruption at Whakaari/White Island. Volcanic Alert Level raised to Level 3 and Aviation Colour Code changed to Orange
2024/06	May 25 2024	0	0	0	0	0	Minor volcanic eruptive activity continues intermittently at Whakaari/White Island. Volcanic Alert Level remains at Level 3 and Aviation Colour Code remains at Orange
2024/07	May 27 2024	0	0	0	0	0	Volcanic unrest continues, no further eruptions have been detected. Volcanic Alert Level remains at Level 3 and Aviation Colour Code remains at Orange
2024/08	May 29 2024	0	0	0	0	0	No further eruptive activity at Whakaari/White Island. Volcanic Alert Level lowered to Level 2 and Aviation Colour Code lowered to Yellow
2024/09	Jun 5 2024	0	0	1	1	0	Volcanic unrest continues at Whakaari/White Island. Volcanic Alert Level remains at Level 2 and Aviation Colour Code remains Yellow
2024/10	Jul 10 2024	0	0	1	1	0	More vigorous gas and steam plume visible at Whakaari/White Island. Volcanic Alert Level remains at Level 2 and Aviation Colour Code remains Yellow
2024/11	Jul 16 2024	0	0	1	1	0	Moderate emission of steam and volcanic gas, with minor ash at Whakaari/White Island. Volcanic Alert Level remains at Level 2 and Aviation Colour Code remains Yellow
2024/12	Jul 23 2024	0	0	1	1	0	Emission of steam and volcanic gas continues; recent minor eruptive activity at Whakaari/White Island confirmed. Volcanic Alert Level remains at Level 2 and Aviation Colour Code remains Yellow
2024/13	Jul 26 2024	0	0	1	1	0	Brief ash emission at Whakaari. Volcanic Alert Level remains at Level 2 and Aviation Colour Code remains Yellow
2024/14	Aug 9 2024	0	0	0	0	0	Minor eruption occurred at Whakaari/White Island. Volcanic Alert Level raised to Level 3 and Aviation Colour Code raised to Orange
2024/15	Aug 11 2024	0	0	0	0	0	Continuous minor eruption at Whakaari/White Island. Volcanic Alert Level remains at Level 3 and Aviation Colour Code remains at Orange
2024/16	Aug 12 2024	0	0	0	0	0	Shallow magma likely at Whakaari/White Island. Volcanic Alert Level remains at Level 3 and Aviation Colour Code remains at Orange
2024/17	Aug 14 2024	1	0	0	1	0	Minor ash emissions continue at Whakaari. Volcanic Alert Level remains at Level 3 and Aviation Colour Code remains at Orange
2024/18	Aug 16 2024	0	1	1	2	0	Update from gas flight: volcanic gas emissions increase with minor ash emissions continuing. Volcanic Alert Level remains at Level 3 and Aviation Colour Code remains at Orange
2024/19	Aug 27 2024	0	0	2	2	0	Minor eruptive activity continues at Whakaari: volcanic ash emissions continue. Volcanic Alert Level remains at Level 3 and Aviation Colour Code remains at Orange
2024/20	Sep 12 2024	0	0	2	2	0	Low level eruption continues with variable gas and ash emissions at Whakaari/White Island. Volcanic Alert Level remains at Level 3 and Aviation Colour Code at Orange
2024/21	Sep 30 2024	0	0	1	1	0	Eruption may be declining at Whakaari/White Island but gas and ash emissions remain variable. Volcanic Alert Level remains at Level 3 and Aviation Colour Code at Orange
2024/22	Oct 22 2024	0	0	1	1	0	End of eruption at Whakaari/White Island, steam and gas emissions remain variable. Volcanic Alert Level lowered to Level 2 and Aviation Colour Code changed to Yellow
2024/23	Dec 12 2024	0	0	1	1	0	Larger steam and gas plumes visible at Whakaari. Volcanic Alert Level remains at Level 2 and Aviation Colour Code at Yellow
2024/24	Dec 16 2024	0	0	1	1	0	Larger steam and gas plumes with intermittent ash emissions at Whakaari. Volcanic Alert Level remains at Level 2 and Aviation Colour Code is raised to Orange
2024/25	Dec 23 2024	0	0	0	0	0	Reduced steam and gas plumes at Whakaari. Volcanic Alert Level remains at Level 2 and Aviation Colour Code is lowered to Yellow

## Sheet: Taupo
Id	Date	Nproduct	Nbespoke	Nphoto-video	Nscience-data	Nhazard-risk	Title
2022/01	Jul 27 2022	0	3	0	3	0	Earthquake activity under Lake Taupō picks up. Volcanic Alert Level remains at Level 0
2022/02	Aug 24 2022	0	2	0	2	0	Earthquake activity continues and deformation observed at Taupō. Volcanic Alert Level remains at Level 0
2022/03	Sep 14 2022	0	2	0	2	0	Earthquake activity continues at Taupō. M 4.2 event felt locally. Volcanic Alert Level remains at Level 0
2022/04	Sep 20 2022	0	3	0	2	1	Taupō Volcano: Volcanic Alert Level raised to Level 1. Ongoing earthquakes and deformation indicating minor volcanic unrest
2022/05	Sep 28 2022	0	3	0	3	0	Minor unrest ongoing at Taupō Volcano. Volcanic Alert Level remains at Level 1
2022/06	Oct 11 2022	0	2	0	2	0	Minor unrest ongoing at Taupō Volcano. Volcanic Alert Level remains at Level 1
2022/07	Nov 16 2022	0	2	0	2	0	Minor unrest ongoing at Taupō Volcano. Volcanic Alert Level remains at Level 1
2022/08	Dec 2 2022	0	2	0	2	0	Strong M5.6 earthquake consistent with continued minor volcanic unrest at Taupō. Volcanic Alert Level remains at Level 1
2022/09	Dec 7 2022	0	1	0	1	0	No further unusual activity since the M5.6 earthquake beneath Lake Taupō. Volcanic Alert Level remains at Level 1
2023/01	Jan 12 2023	0	4	0	4	0	Minor unrest continues at Taupō Volcano. Volcanic Alert Level remains at Level 1
2023/02	Mar 7 2023	0	1	0	1	0	Minor unrest continues at Taupō Volcano including a recent M4.4 earthquake. Volcanic Alert Level remains at Level 1
2023/03	Apr 5 2023	0	1	0	1	0	Taupō Volcano remains in minor unrest despite earthquake activity having almost returned to normal. Volcanic Alert Level remains at Level 1
2023/04	May 30 2023	0	1	0	1	0	Volcanic activity at Taupō Volcano is now back to background levels. The Volcanic Alert Level is lowered to Level 0

## Sheet: Tongariro
Id	Date	Nproduct	Nbespoke	Nphoto-video	Nscience-data	Nhazard-risk	Title
2012/01	Jul 20 2012	0	0	0	0	0	Earthquake activity, Mt Tongariro
2012/02	Jul 23 2012	0	0	0	0	0	Mt Tongariro update
2012/03	Jul 31 2012	0	1	0	1	0	Mt Tongariro update
2012/04	Aug 6 2012	0	1	0	1	0	Mt Tongariro update
2012/05	Aug 7 2012	0	0	0	0	0	Probable Eruption at Tongariro Volcanic Alert Level has changed from 1 to 2 Aviation Colour Code has changed from yellow to red
2012/06	Aug 7 2012	1	0	0	0	1	Volcanic Ashfall prediction
2012/07	Aug 7 2012	0	0	0	0	0	Volcano Update
2012/08	Aug 7 2012	1	0	0	0	1	Volcanic Ashfall prediction
2012/09	Aug 8 2012	1	0	0	0	1	Updated ashfall prediction for 12:00 noon, Wednesday 8th August 2012
2012/10	Aug 8 2012	0	0	2	2	0	Volcano Update
2012/11	Aug 9 2012	0	0	0	0	0	Volcano Update
2012/12	Aug 9 2012	1	0	0	0	1	No title
2012/13	Aug 10 2012	1	0	0	0	1	Tongariro Eruption Update
2012/14	Aug 11 2012	1	0	0	0	1	Tongariro Eruption Update
2012/15	Aug 11 2012	0	1	0	0	1	New Northern Tongariro Volcanic Phenomena Map
2012/16	Aug 12 2012	1	0	0	0	1	Tongariro Eruption Update
2012/17	Aug 13 2012	1	0	0	0	1	Tongariro Eruption Update
2012/18	Aug 13 2012	1	0	0	0	1	Tongariro Eruption Update
2012/19	Aug 14 2012	1	0	0	0	1	Tongariro Eruption Update
2012/20	Aug 15 2012	1	0	0	0	1	Tongariro Eruption Update
2012/21	Aug 16 2012	1	0	0	0	1	Tongariro Eruption Update
2012/22	Aug 17 2012	0	0	0	0	0	Tongariro Volcanic Alert Level Reduced to 1
2012/23	Aug 27 2012	0	1	0	0	1	Revised Eruption Phenomena Map for Te Maari, Tongariro
2012/24	Aug 28 2012	0	0	0	0	0	Tongariro Update
2012/25	Sep 20 2012	0	0	2	0	2	Tongariro Update
2012/26	Nov 21 2012	0	0	1	1	0	Eruption at Tongariro- Te Maari Craters Volcanic Alert Level has changed from 1 to 2 Aviation Colour Code has changed from Yellow to Red
2012/27	Nov 21 2012	1	0	0	0	1	No title
2012/28	Nov 21 2012	0	0	0	0	0	Update of Eruption at Tongariro: Activity Decreased
2012/29	Nov 22 2012	0	0	0	0	0	Update of Eruption at Tongariro: low volcanic activity overnight
2012/30	Nov 22 2012	0	0	0	0	0	Activity decreased at Tongariro but risk remains high
2012/31	Nov 22 2012	0	0	0	0	0	Tongariro still gasing but no ash
2012/32	Nov 23 2012	1	0	0	1	0	Another quiet night at Tongariro
2012/33	Nov 23 2012	0	0	0	0	0	Activity still low at Tongariro
2012/34	Nov 26 2012	0	0	0	0	0	Volcanic Alert Level lowered to Level 1, activity low at Tongariro
2012/35	Dec 3 2012	0	0	0	0	0	Activity remains low at Tongariro
2012/36	Dec 11 2012	0	0	0	0	0	Prominent gas discharge at Tongariro, but no eruptive activity
2013/01	Jan 14 2013	0	0	1	1	0	Mt Tongariro update: Unrest and volcanic gas emissions continue
2013/02	Feb 14 2013	0	0	0	0	0	Tongariro remains quiet, degassing continues
2013/03	Mar 25 2013	0	0	0	0	0	Tongariro remains quiet, Aviation Colour Code Lowered to Green
2013/04	Aug 6 2013	0	0	0	0	0	Very small earthquakes beneath Tongariro; no change to Volcanic Alert Level or Aviation Colour Code
2013/05	Dec 23 2013	0	0	0	0	0	Update on Tongariro volcano; no change to volcanic alert level
2015/01	Aug 19 2015	0	0	1	1	0	Volcanic unrest at Mt Tongariro is over - Volcanic Alert Level lowered to Level 0
